# Supplementary material for: Imiquimod has strain-dependent effects in mice and does not uniquely model human psoriasis
Source: PubMed Central journal article supplement (PMC5345243; doi:10.1186/s13073-017-0415-3), 2017-03-09

**Additional File 12. Genes associated with toll-like receptor (TLR) signaling are disproportionately elevated by IMQ in all strains.** (A) TLR gene set enrichment analysis (GSEA). GSEA was performed using 101 TLR-associated genes (KEGG database; pathway ID mmu04620). Enrichment greater than zero indicates bias of TLR genes towards IMQ-increased expression (asterisk:  $FDR < 0.05$ , Wilcoxon rank sum test). (B) 129/SvJ females (GSEA analysis). Genes were ranked based upon IMQ response (horizontal axis) and cumulative overlap with the ranked gene list was evaluated (vertical axis). The area between the cumulative overlap curve and diagonal (red) corresponds to the enrichment statistic in part (A). 86 of 101 TLR genes with detectable expression were included in the analysis. (C) CD1 males (GSEA analysis). (D) TLR pathway genes most frequently altered across strains. (E - R) KEGG TLR pathway maps (red: IMQ-increased; yellow: IMQ-decreased).

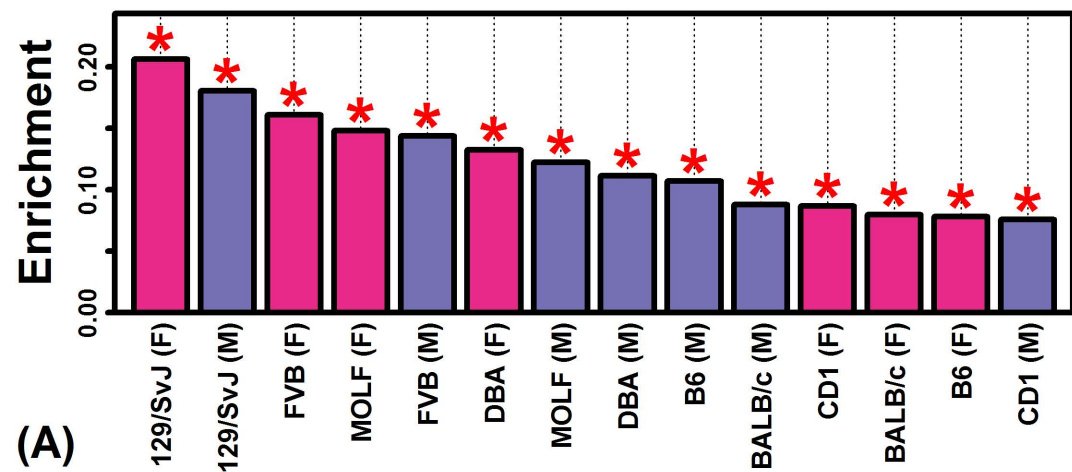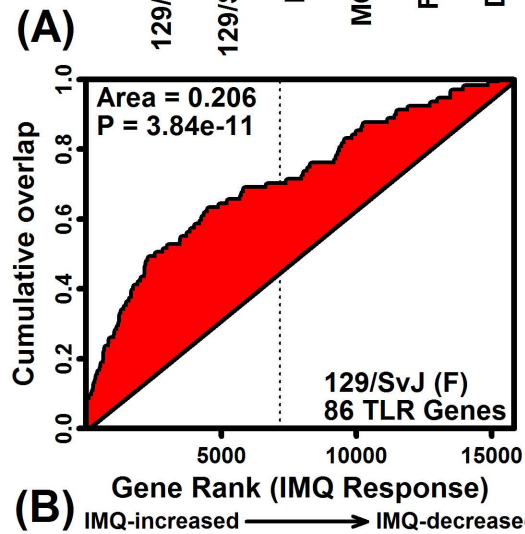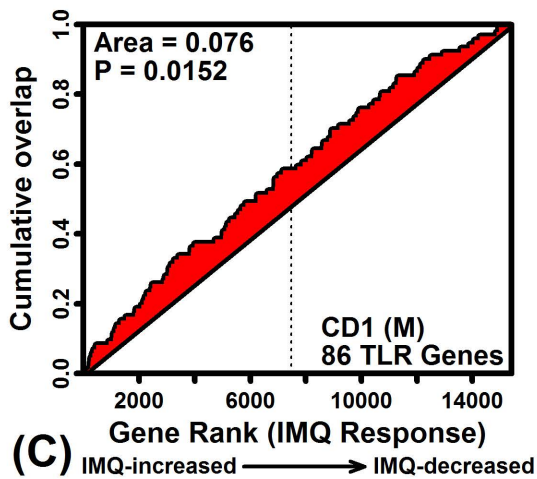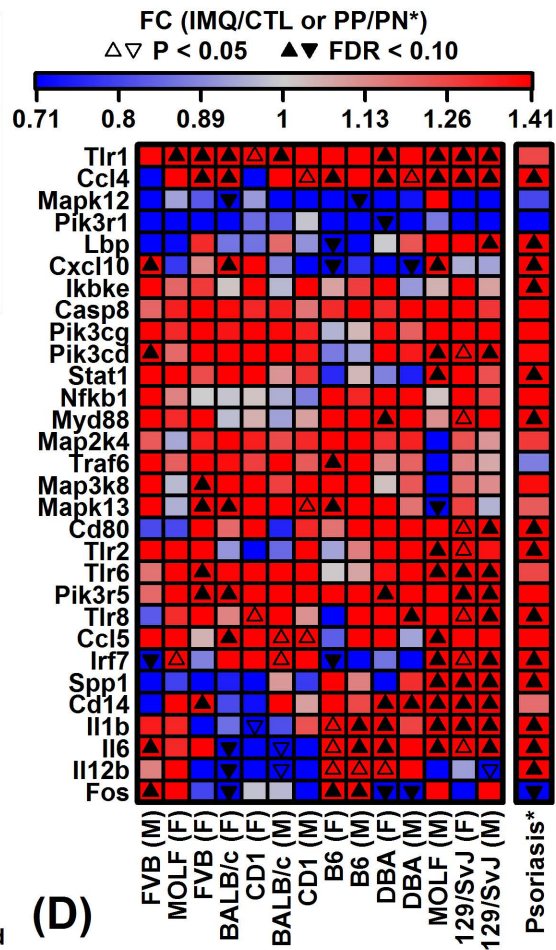

TOLL-LIKE RECEPTOR SIGNALING PATHWAY

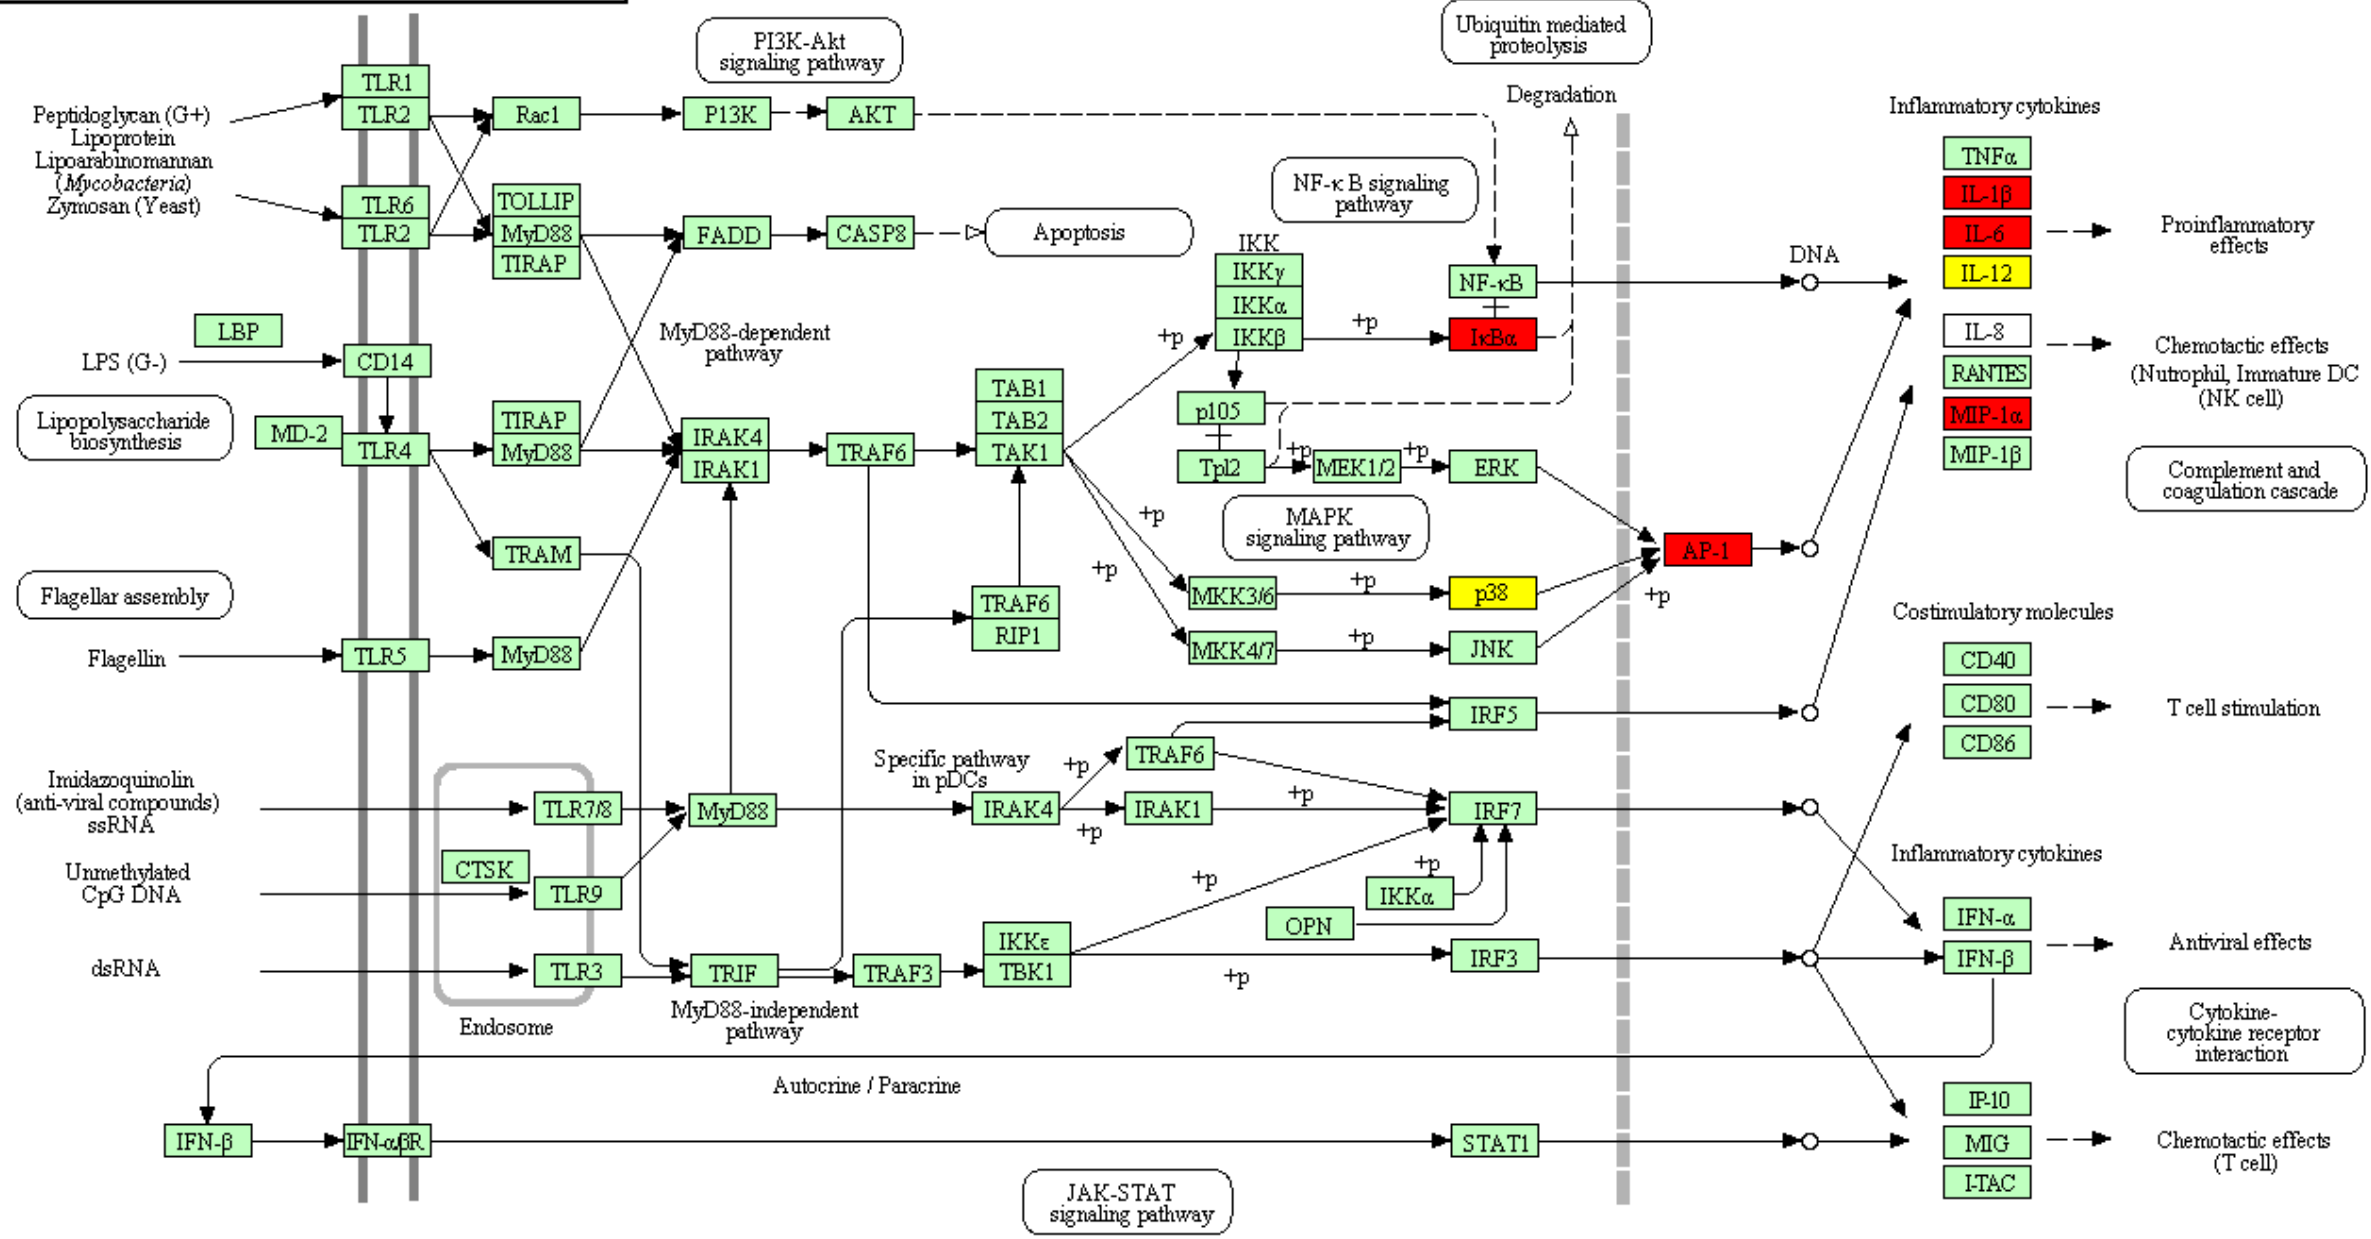

## TOLL-LIKE RECEPTOR SIGNALING PATHWAY

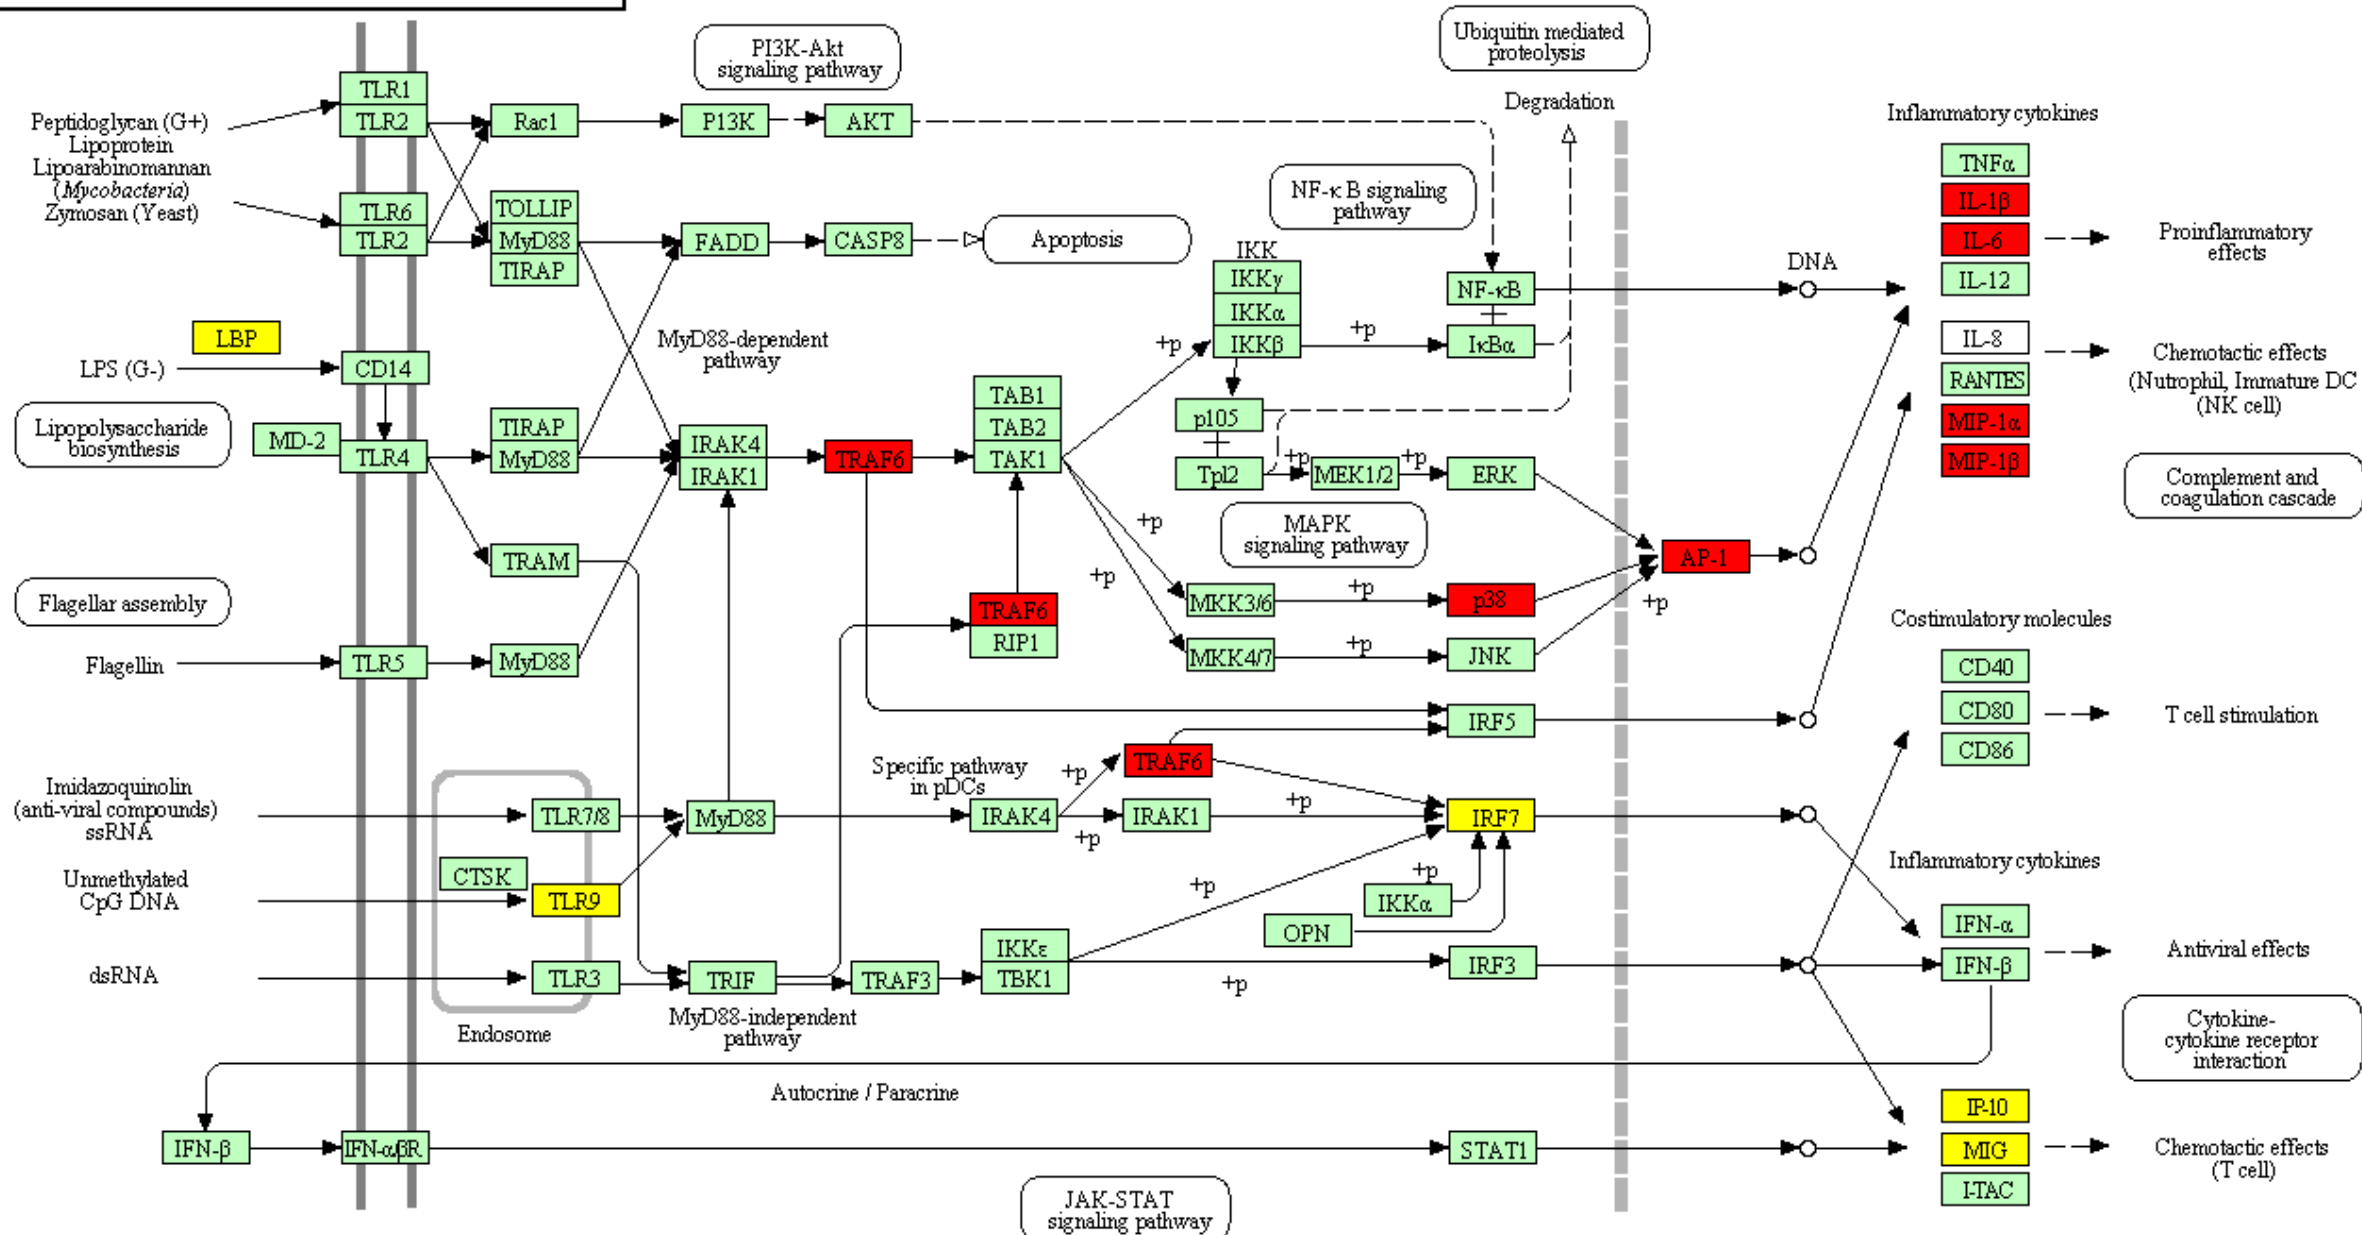

TOLL-LIKE RECEPTOR SIGNALING PATHWAY

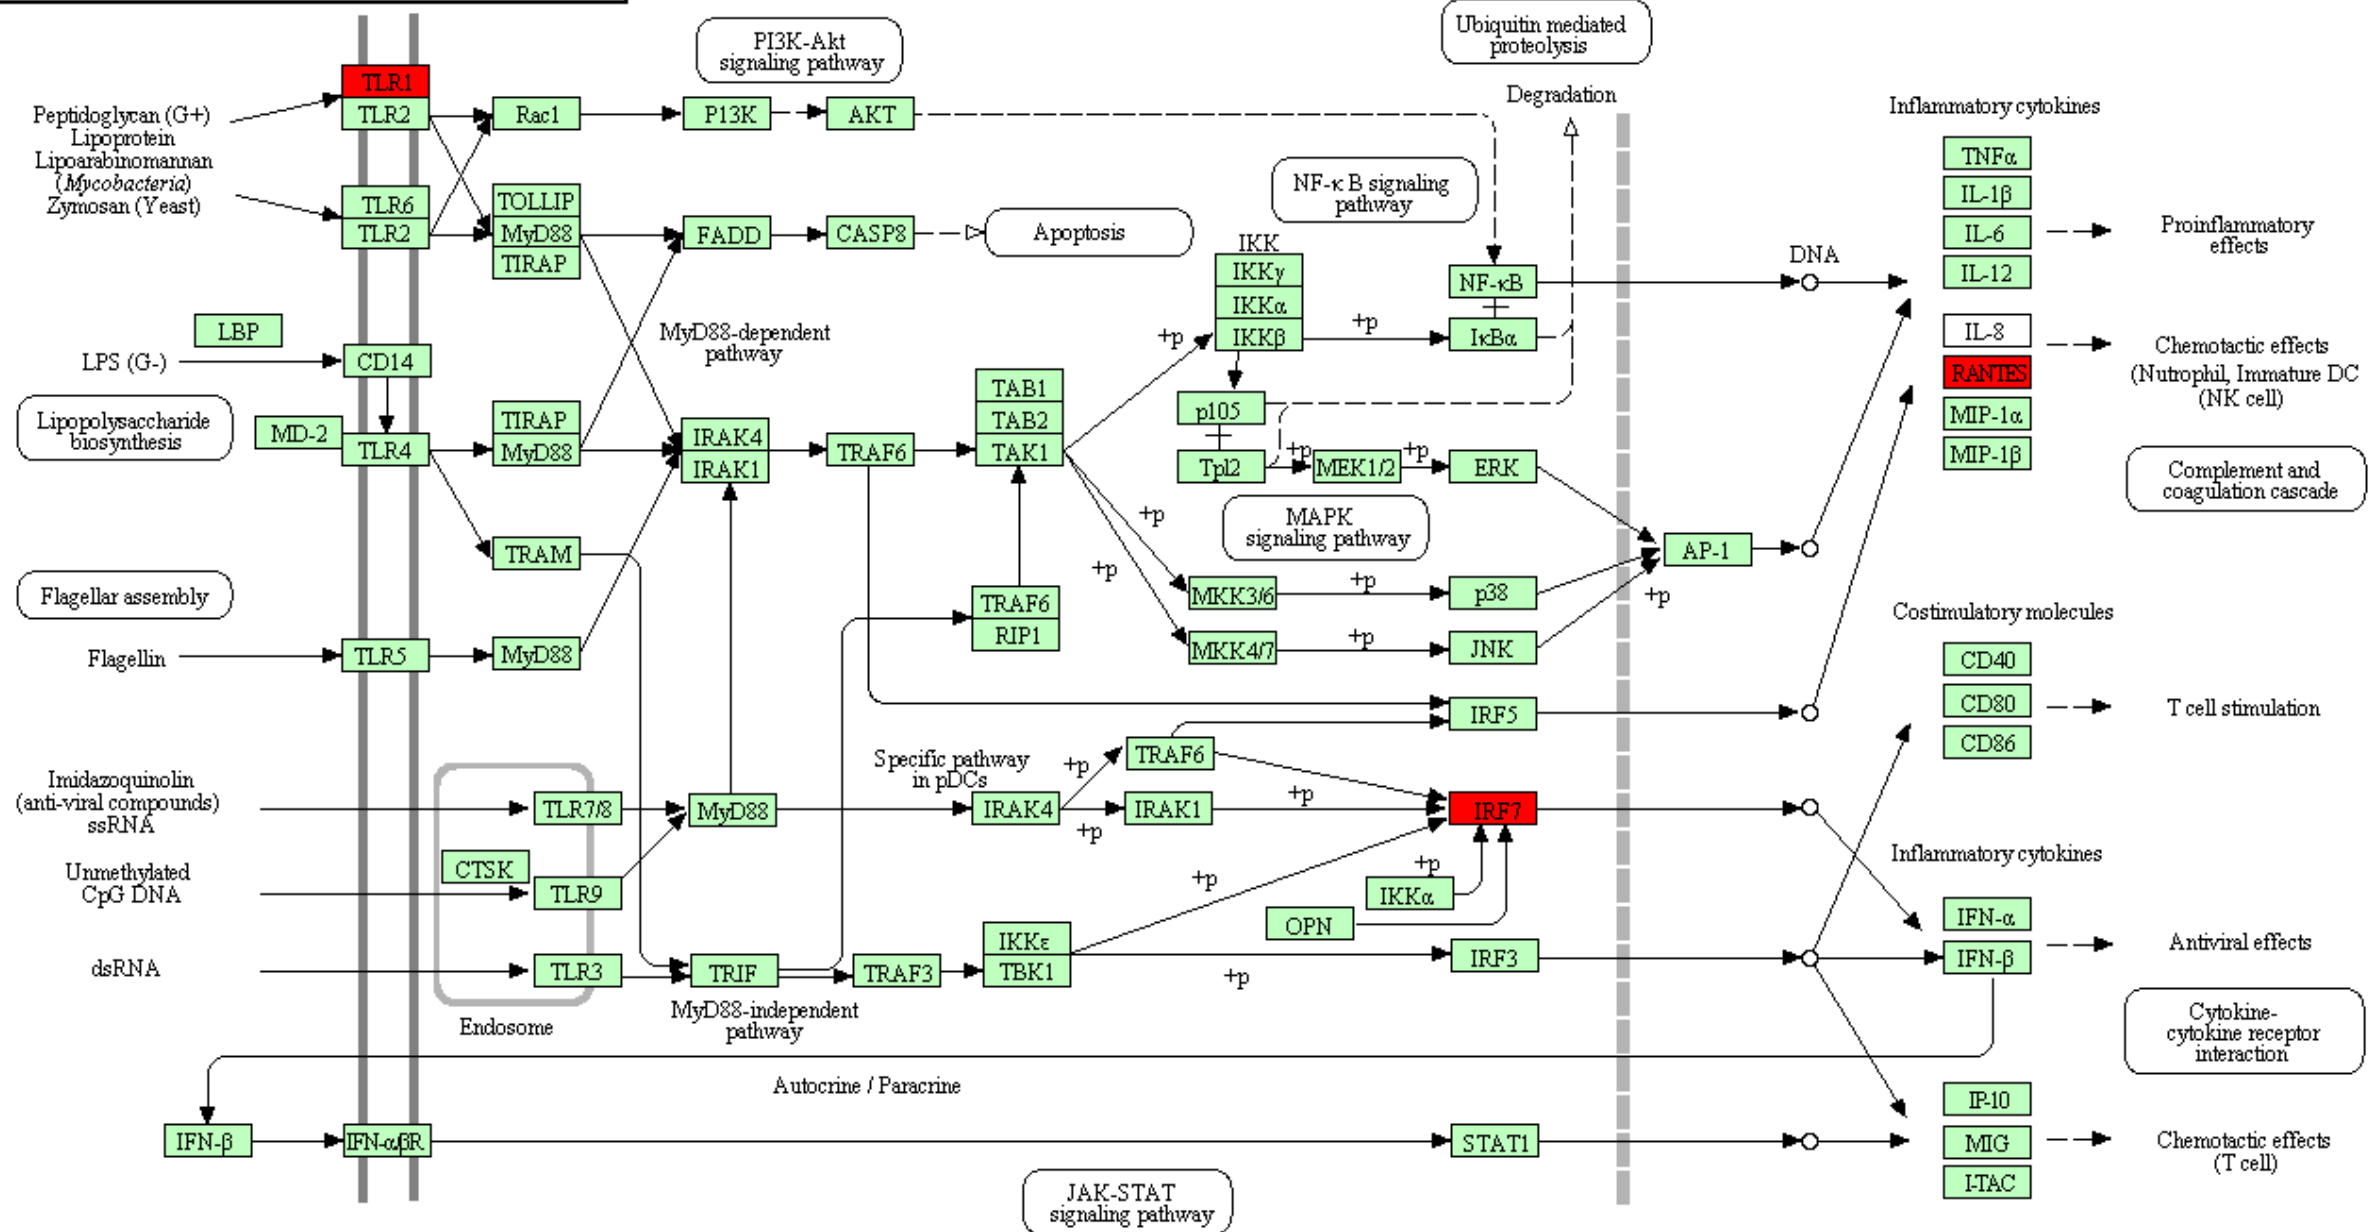

TOLL-LIKE RECEPTOR SIGNALING PATHWAY

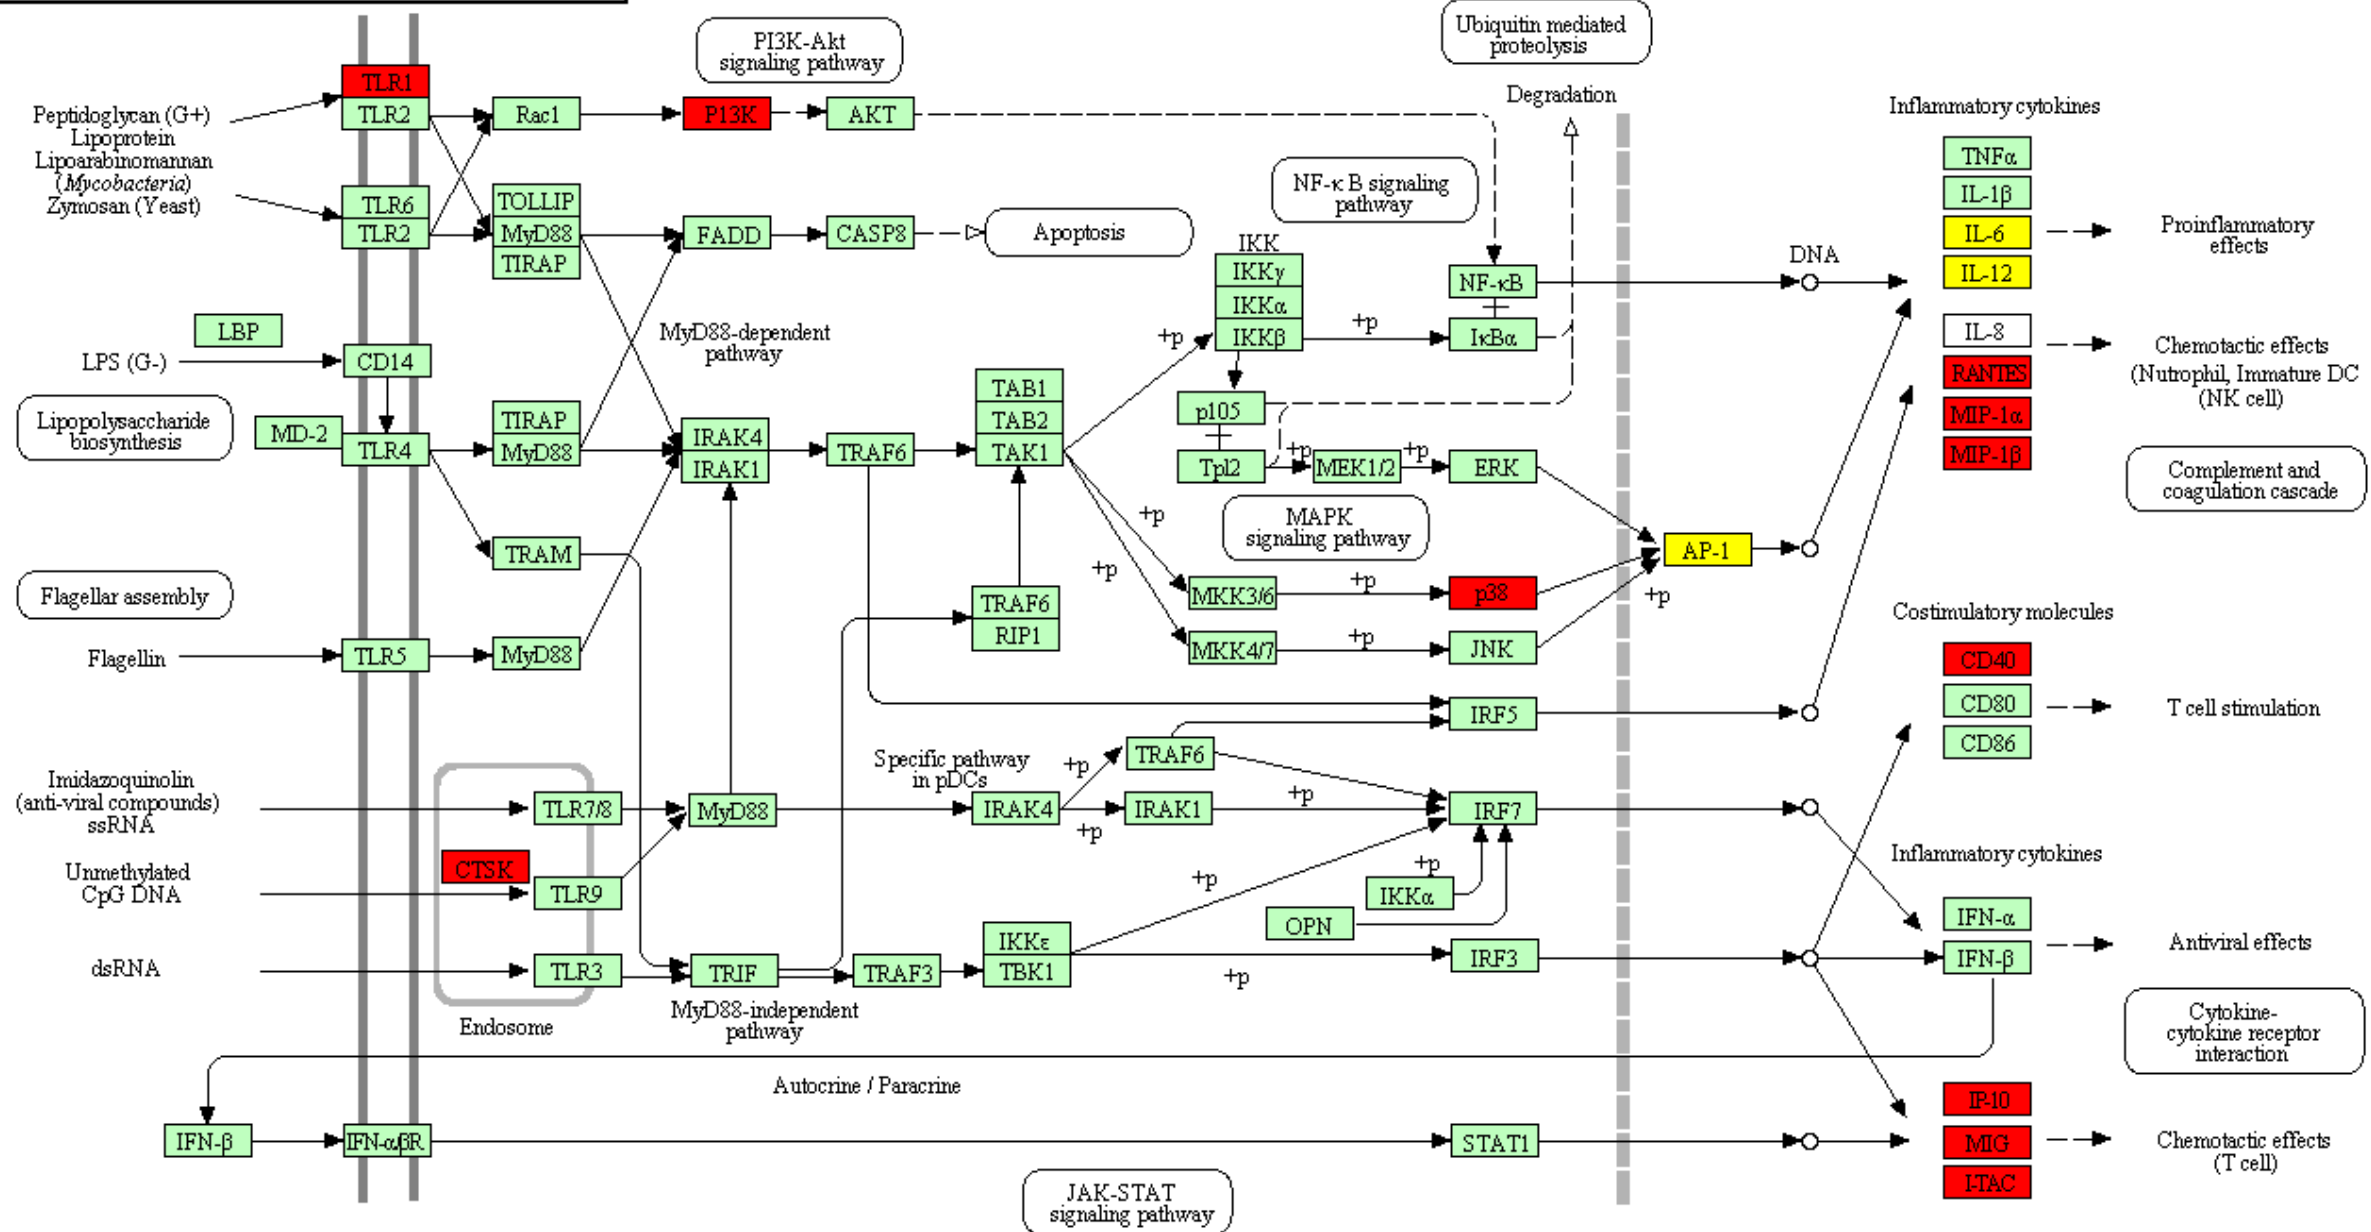

# (I) CD1 (M)

## TOLL-LIKE RECEPTOR SIGNALING PATHWAY

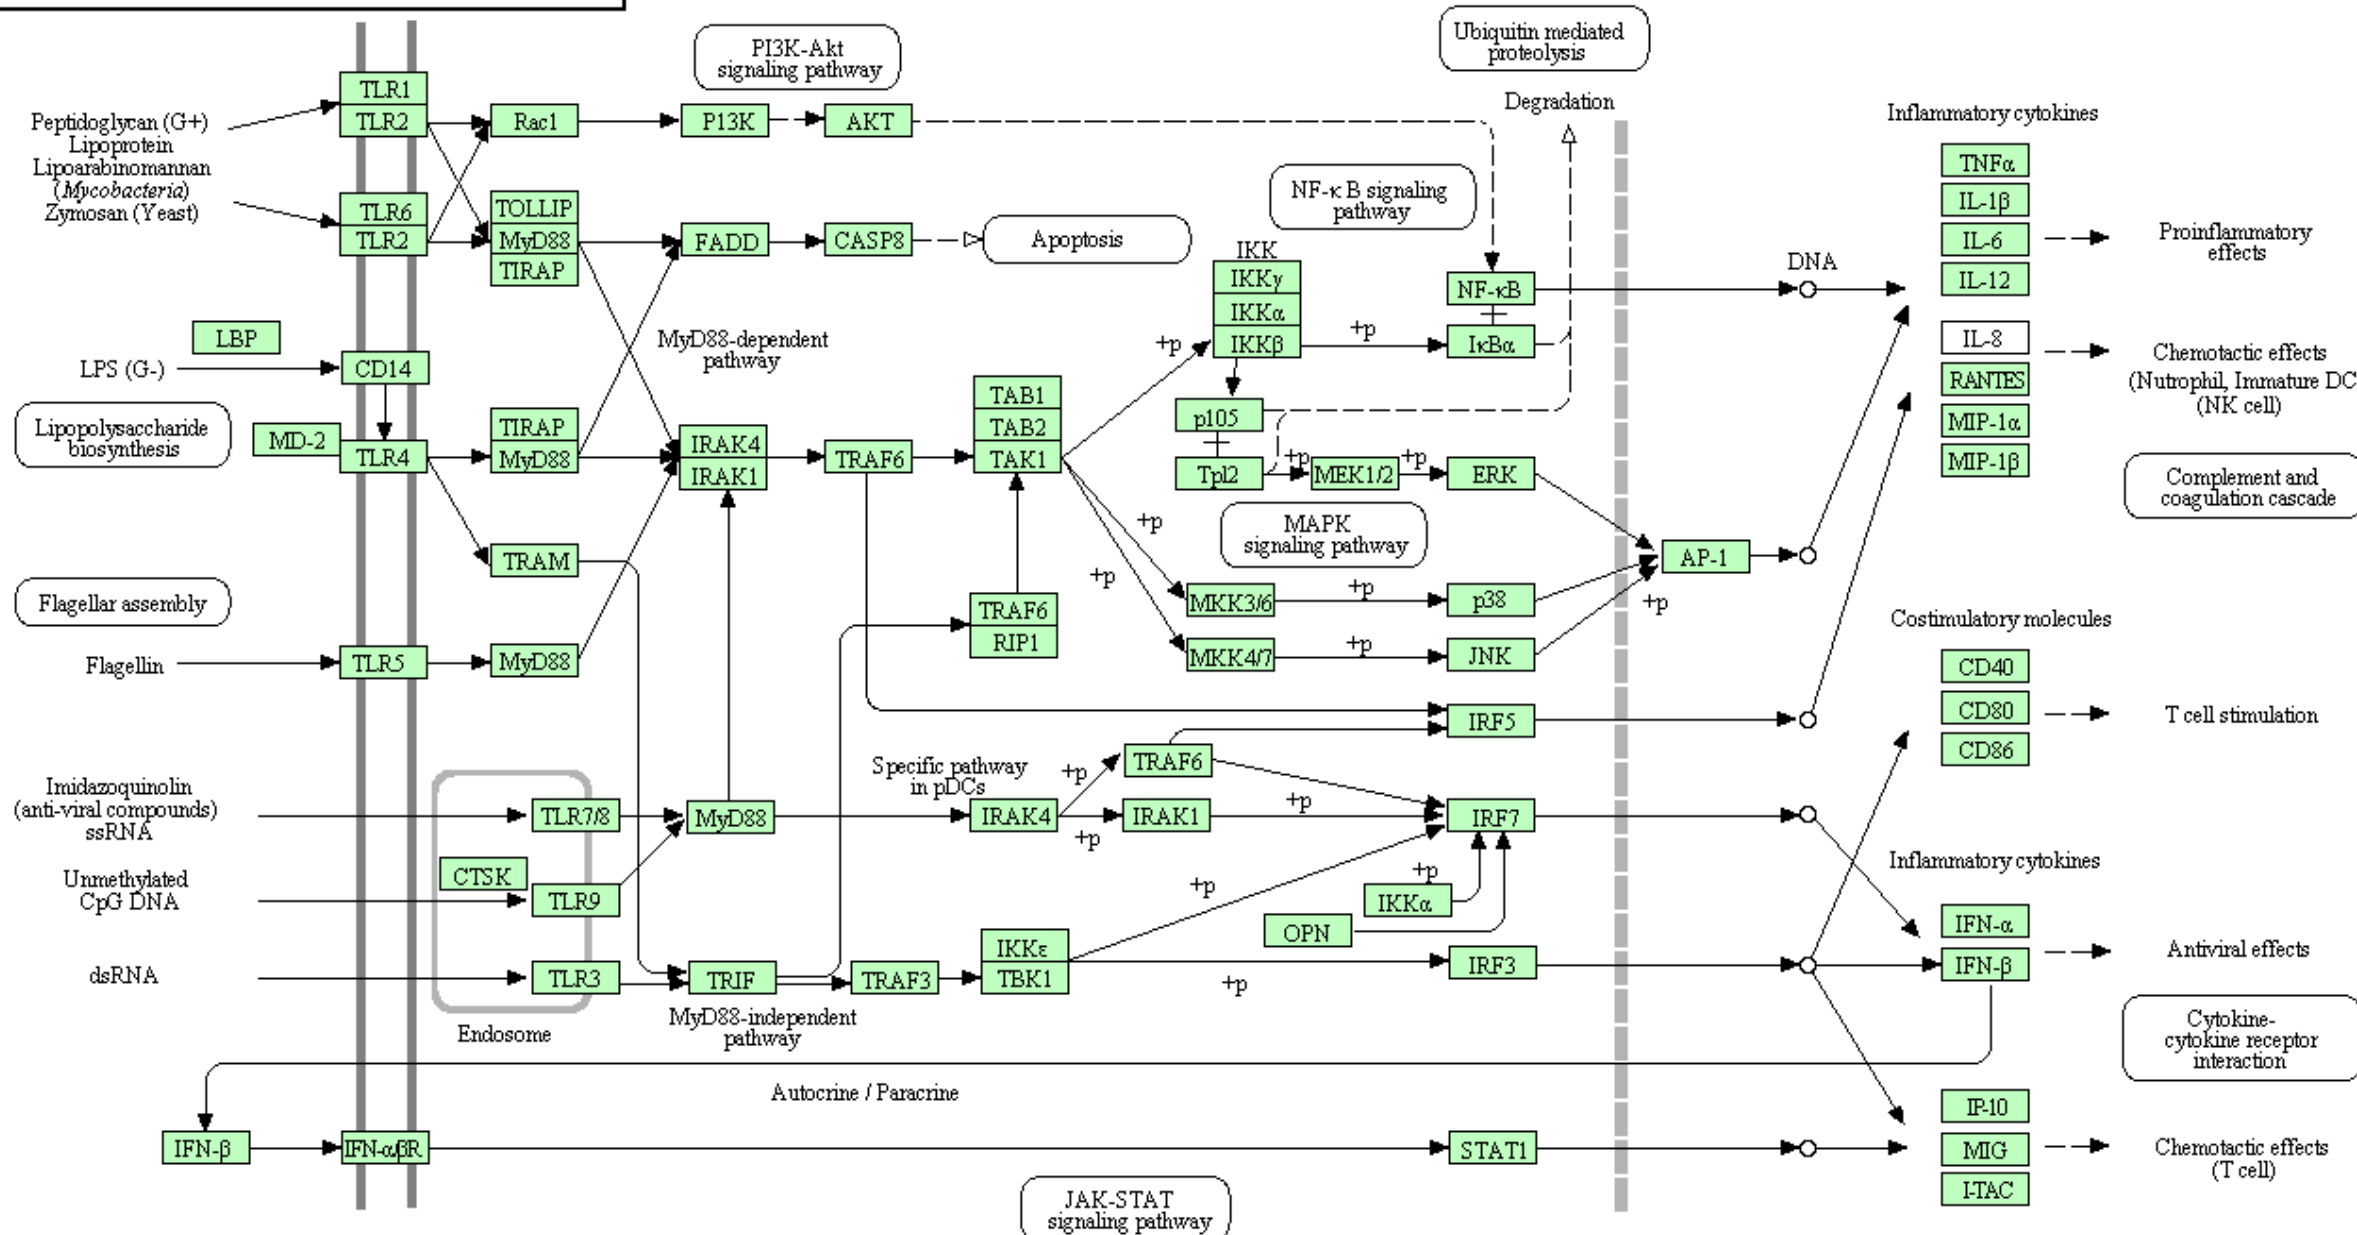

TOLL-LIKE RECEPTOR SIGNALING PATHWAY

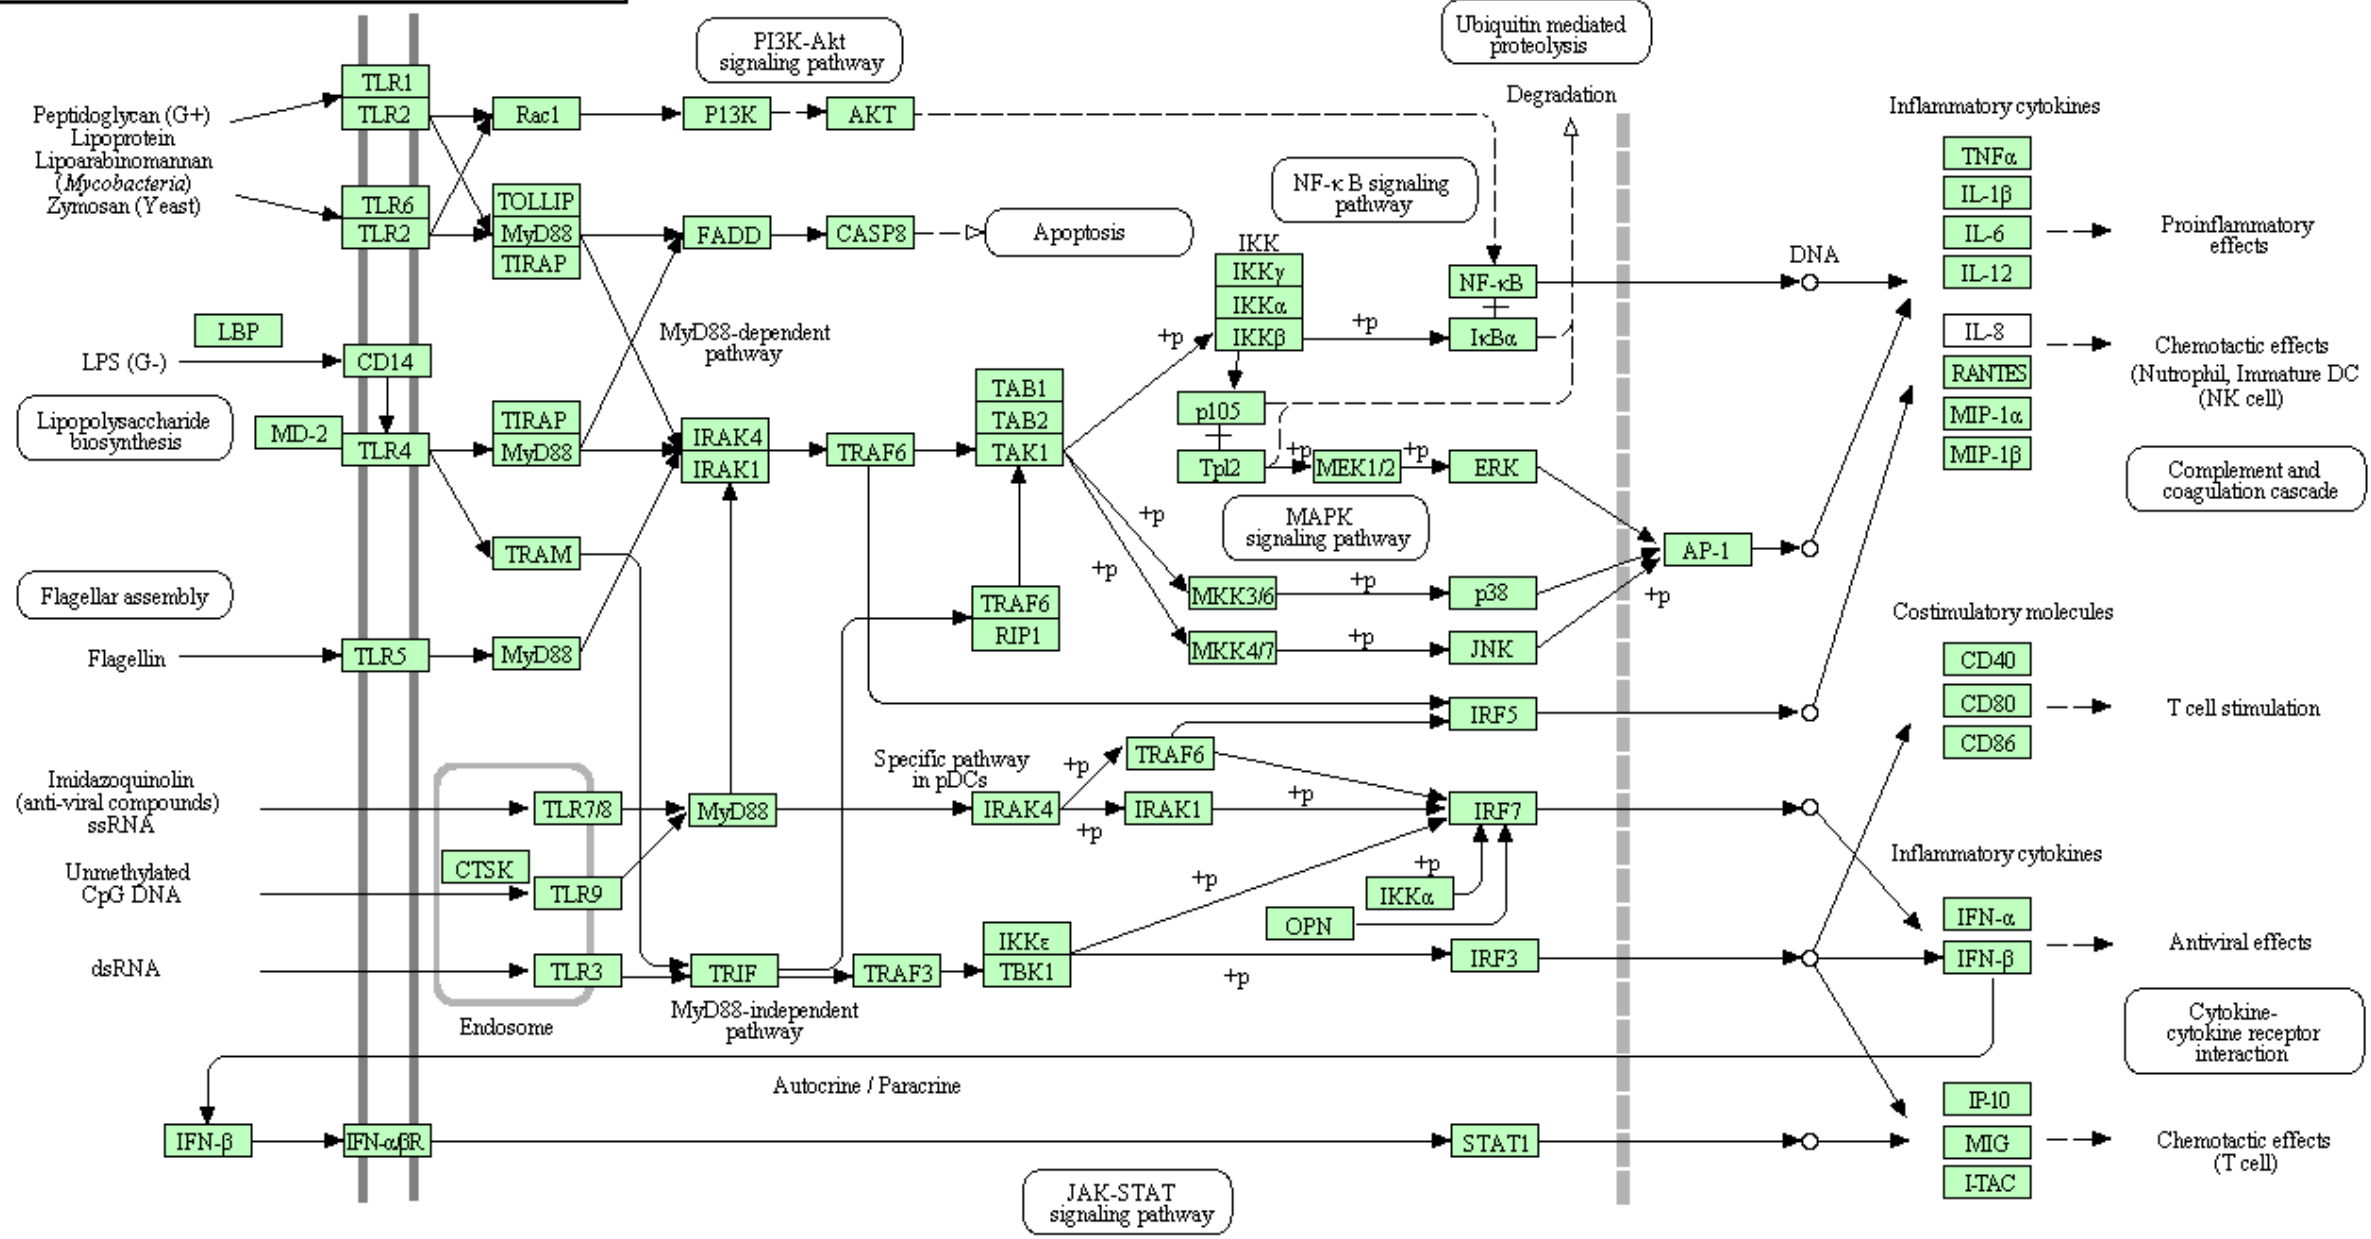



TOLL-LIKE RECEPTOR SIGNALING PATHWAY

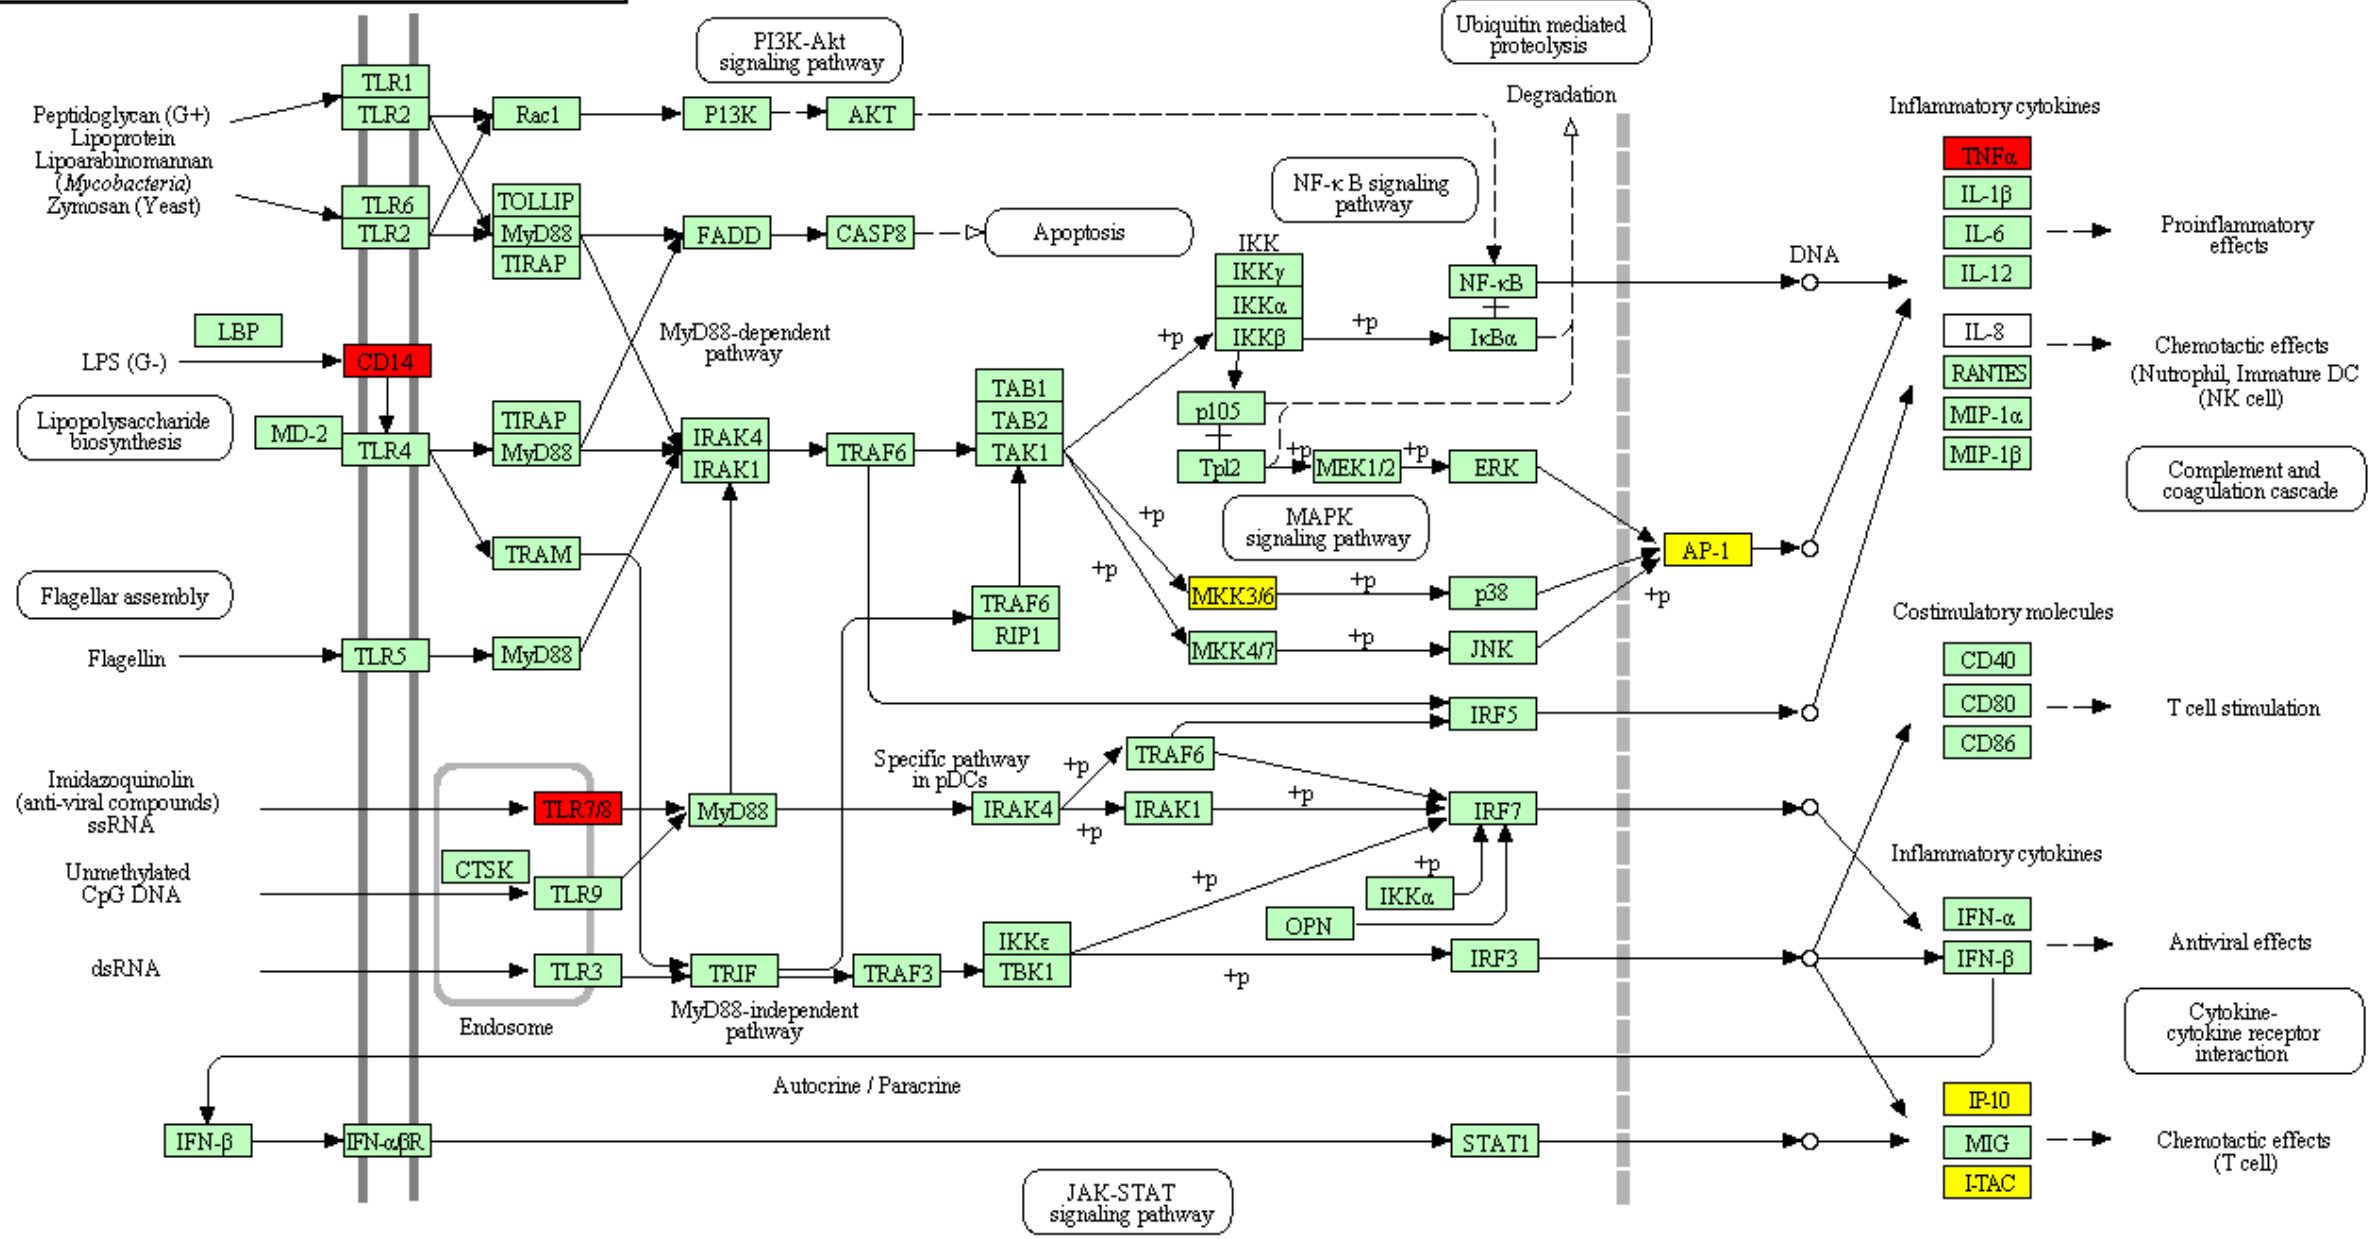

TOLL-LIKE RECEPTOR SIGNALING PATHWAY

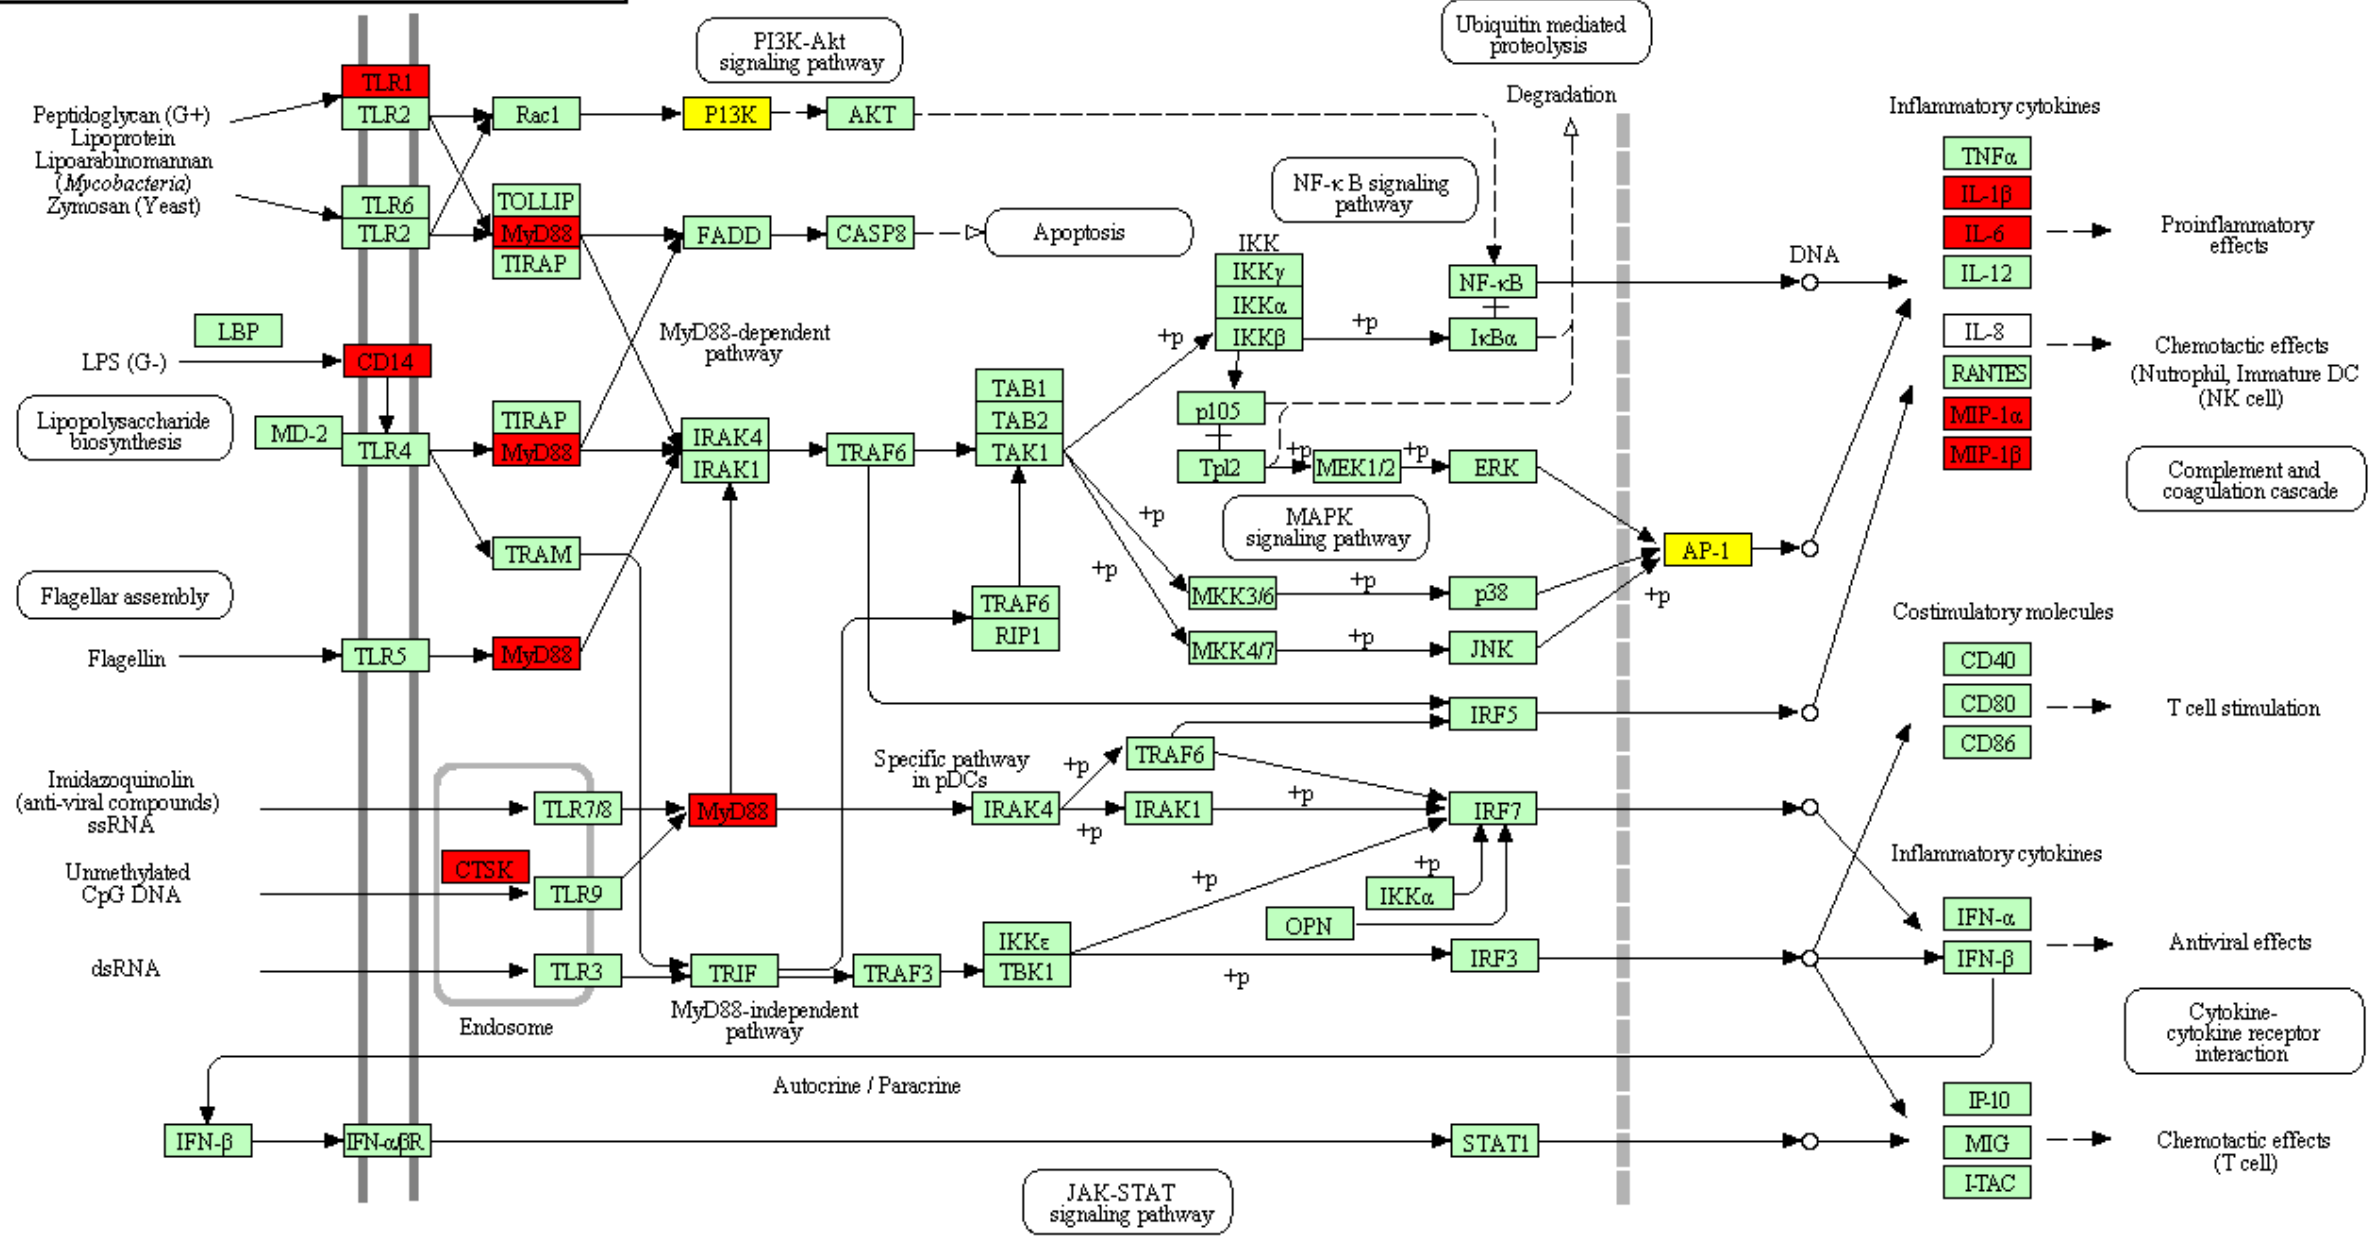

TOLL-LIKE RECEPTOR SIGNALING PATHWAY

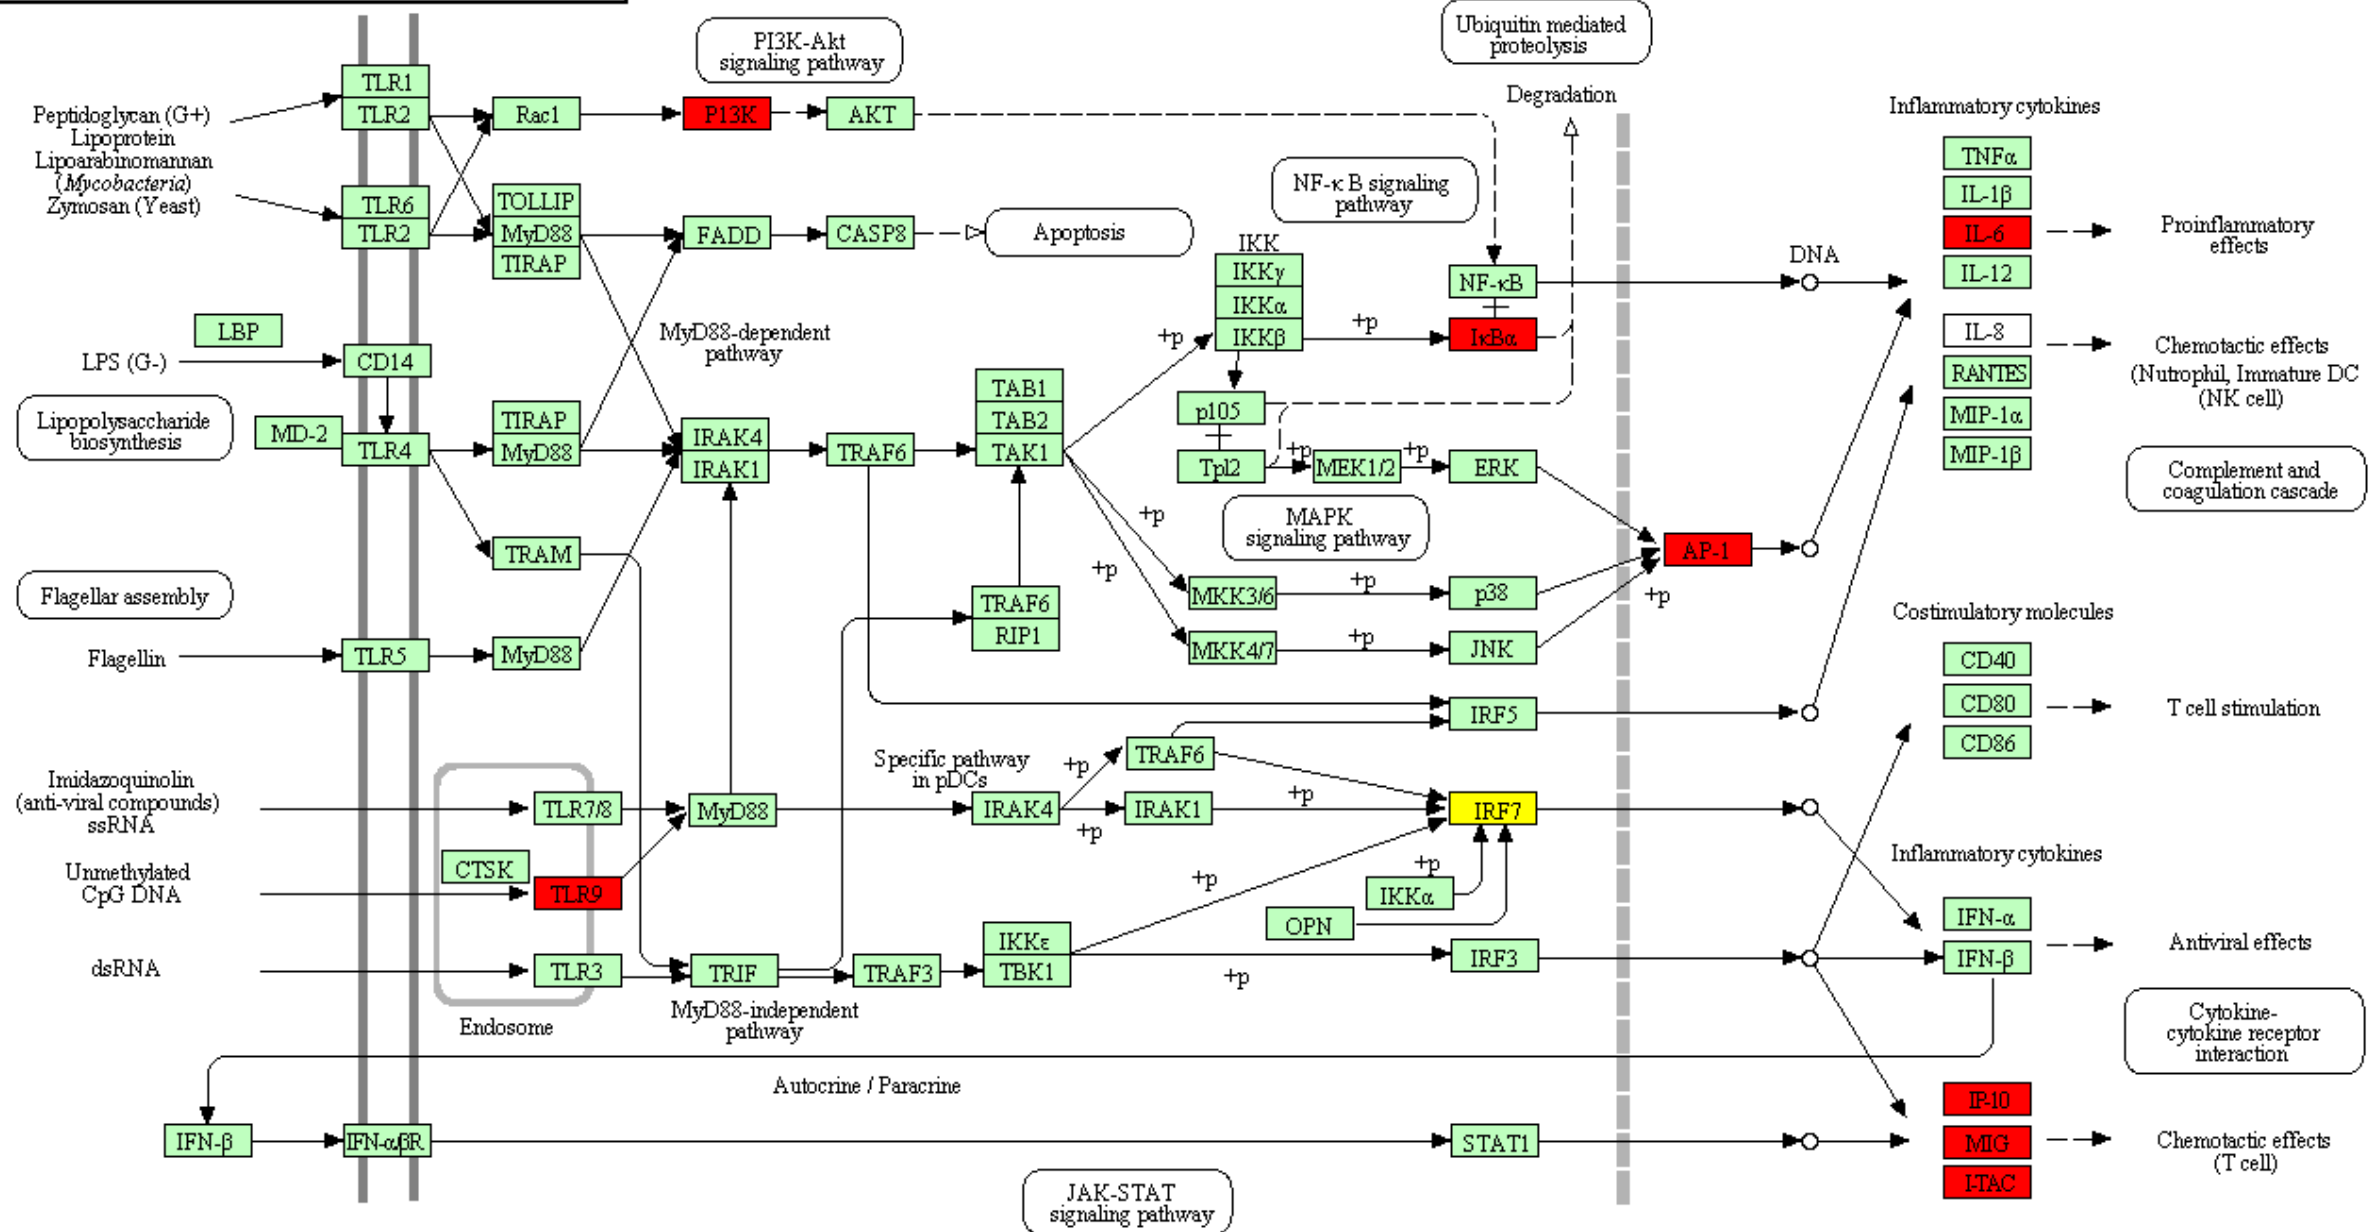

TOLL-LIKE RECEPTOR SIGNALING PATHWAY

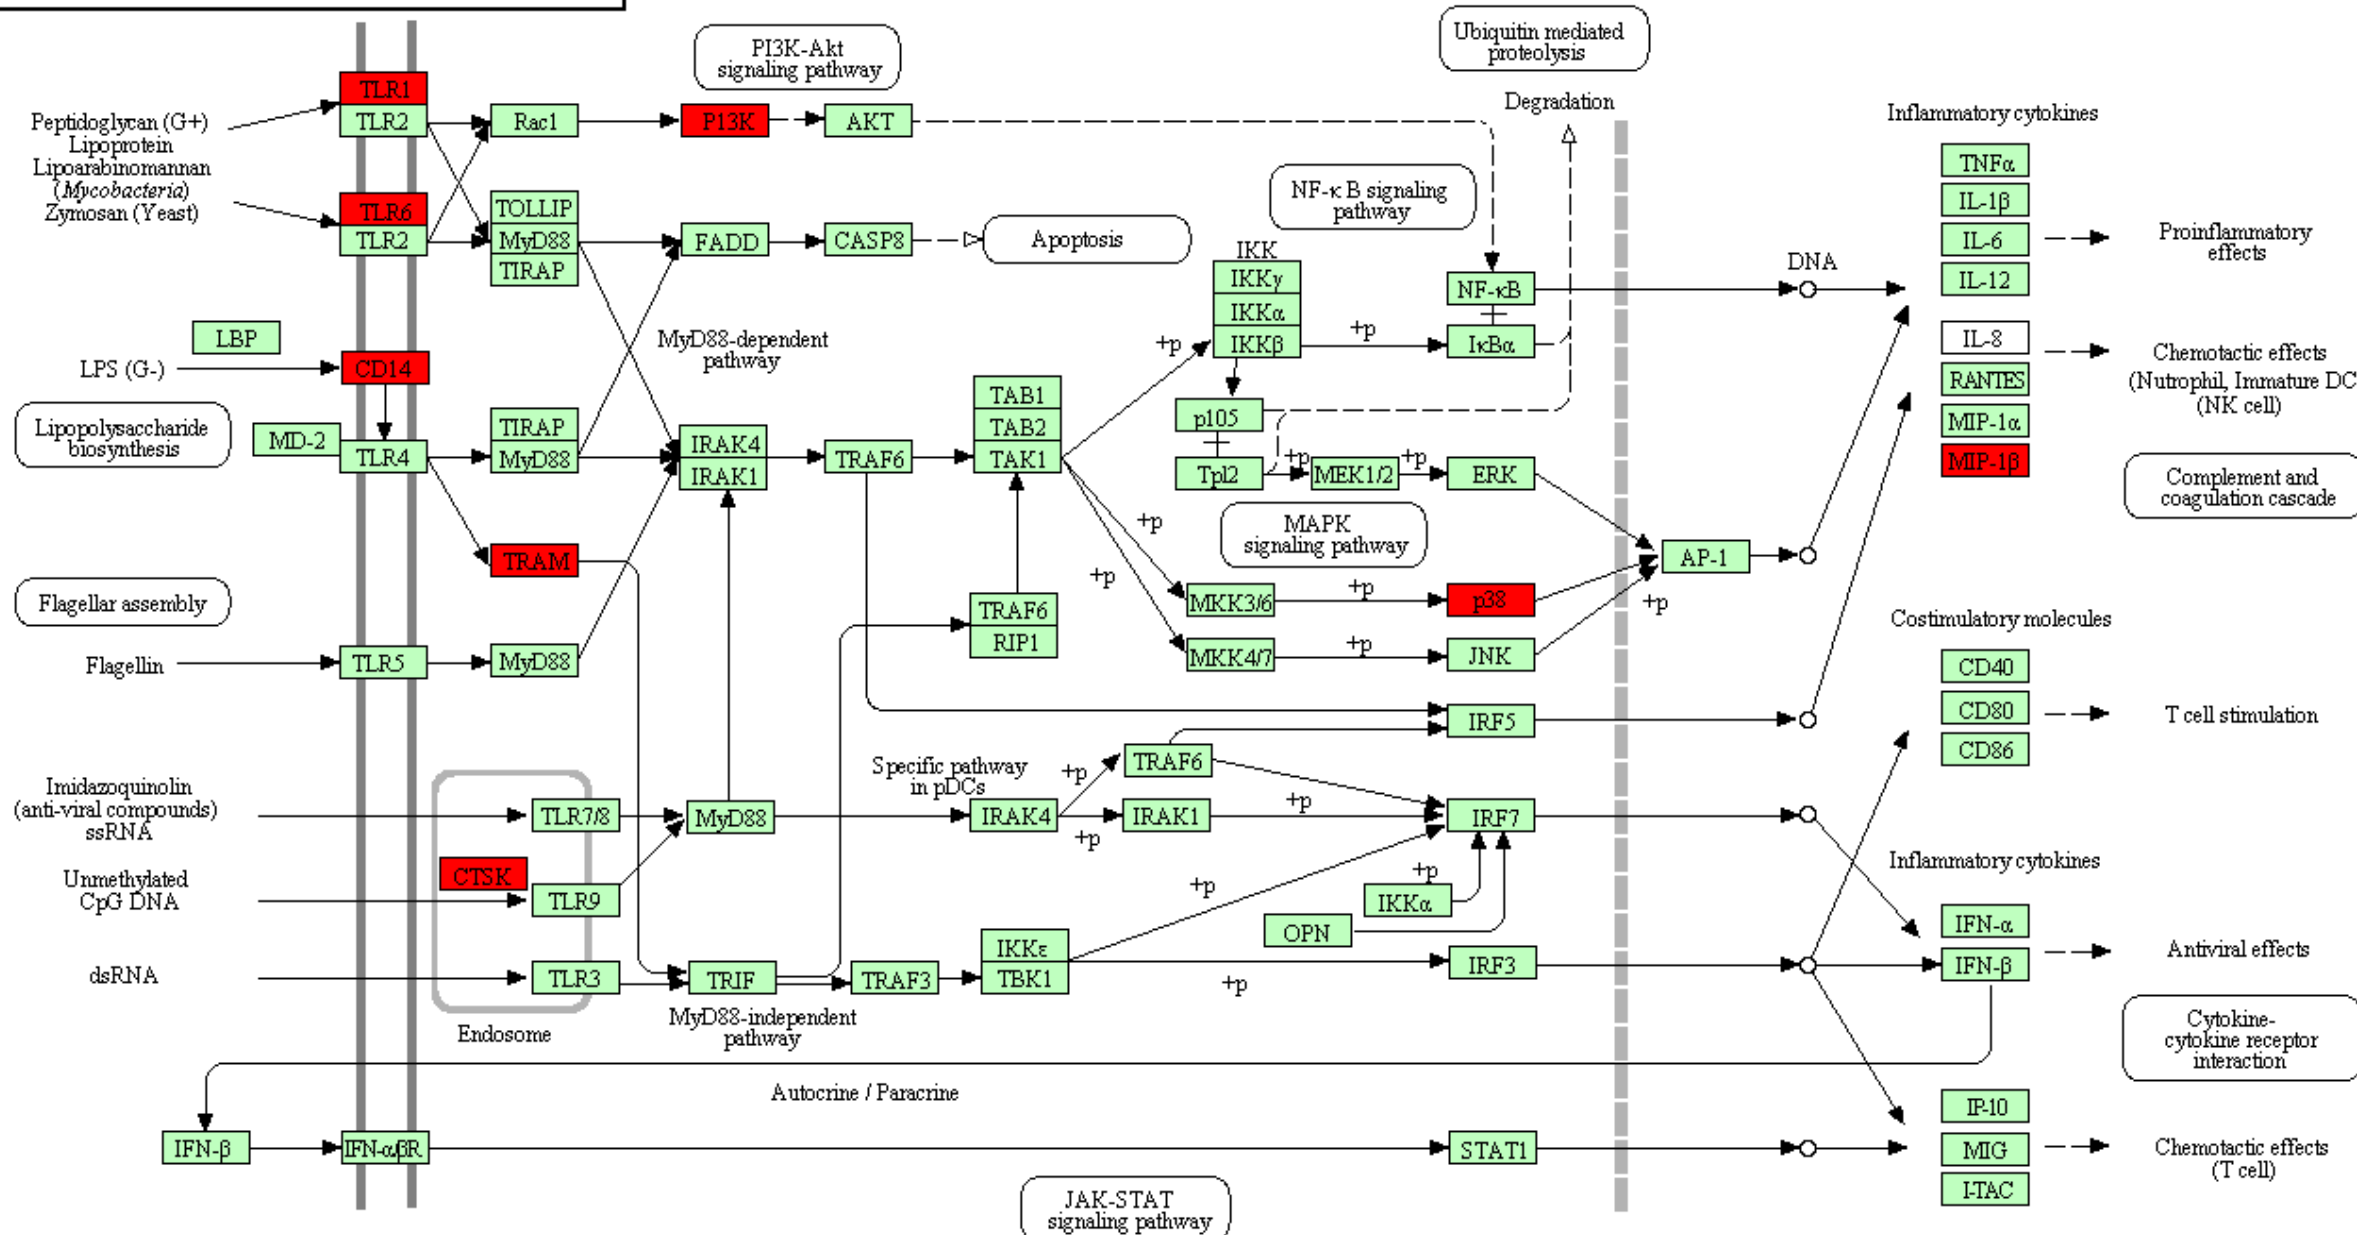

TOLL-LIKE RECEPTOR SIGNALING PATHWAY

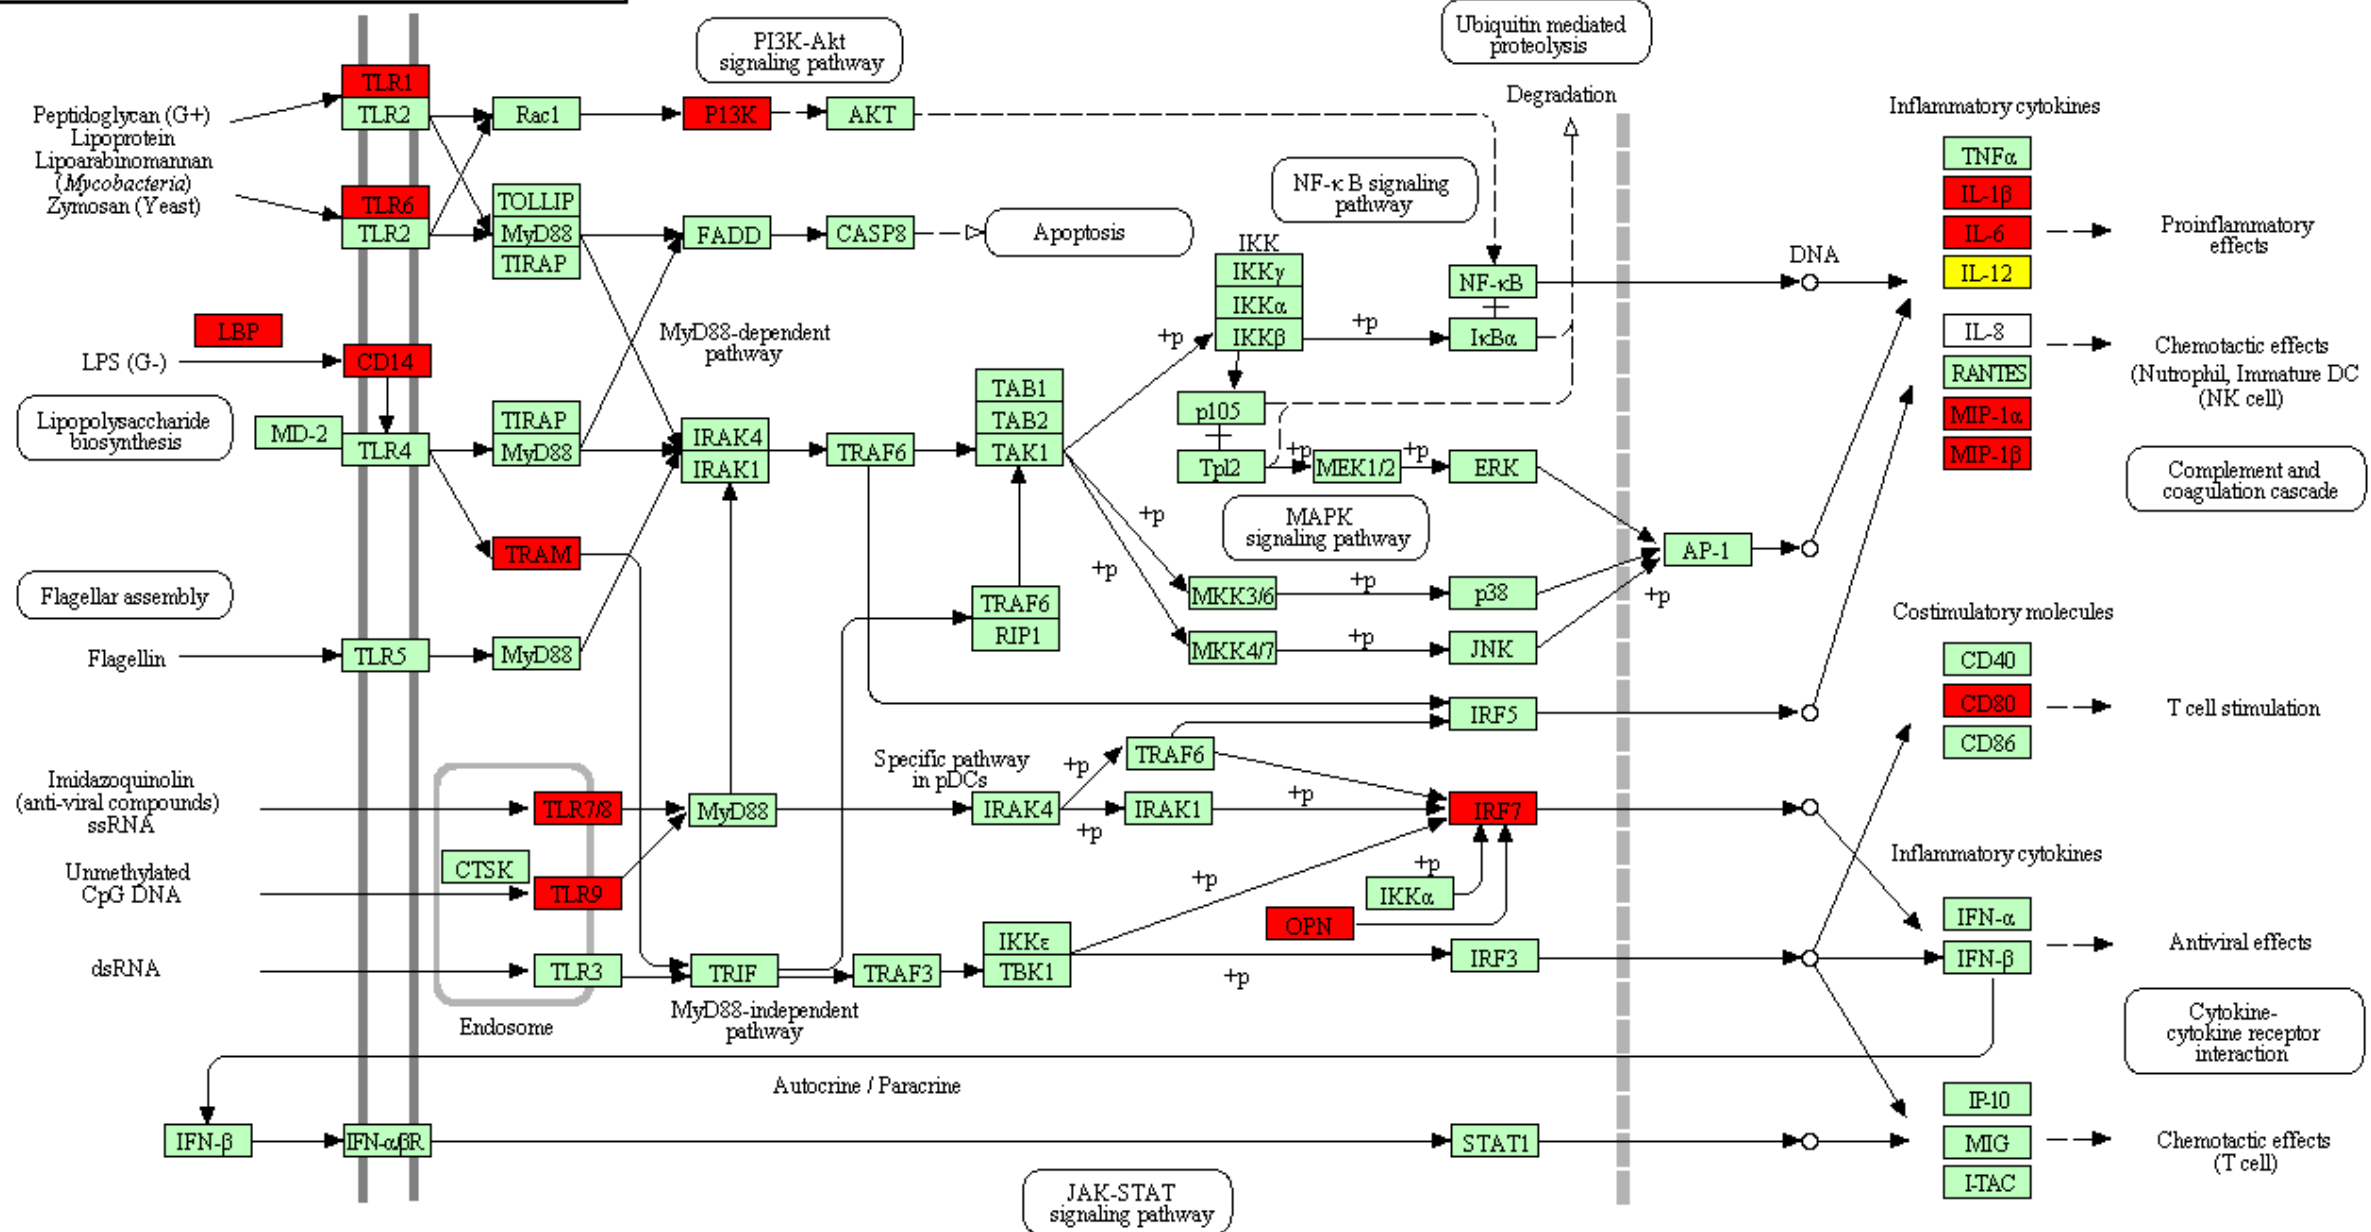

TOLL-LIKE RECEPTOR SIGNALING PATHWAY

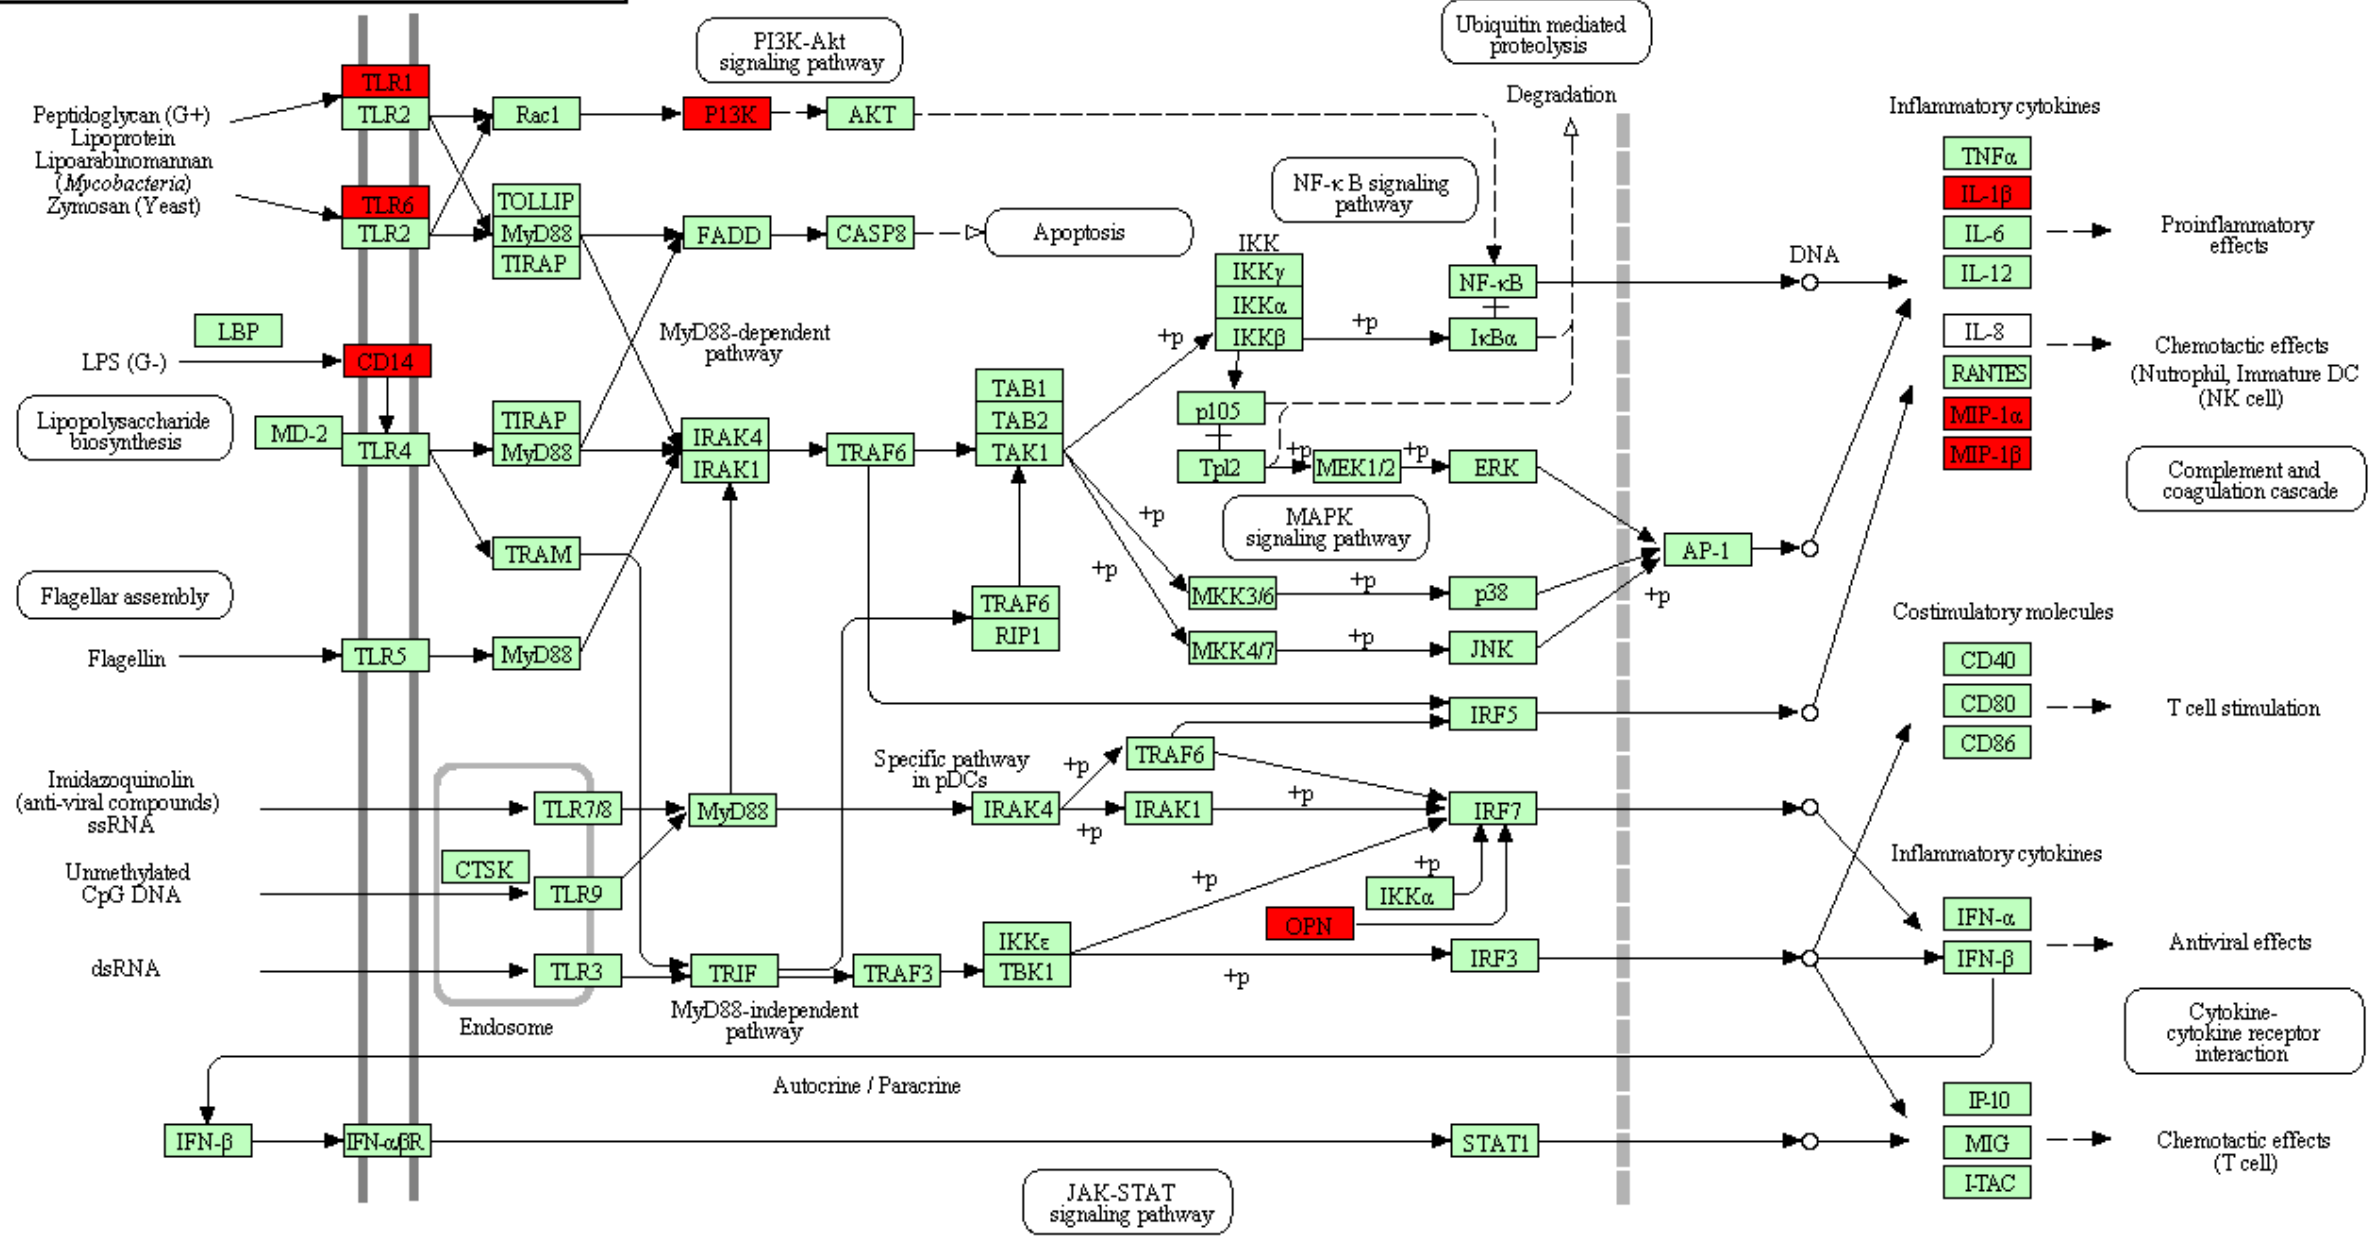

TOLL-LIKE RECEPTOR SIGNALING PATHWAY

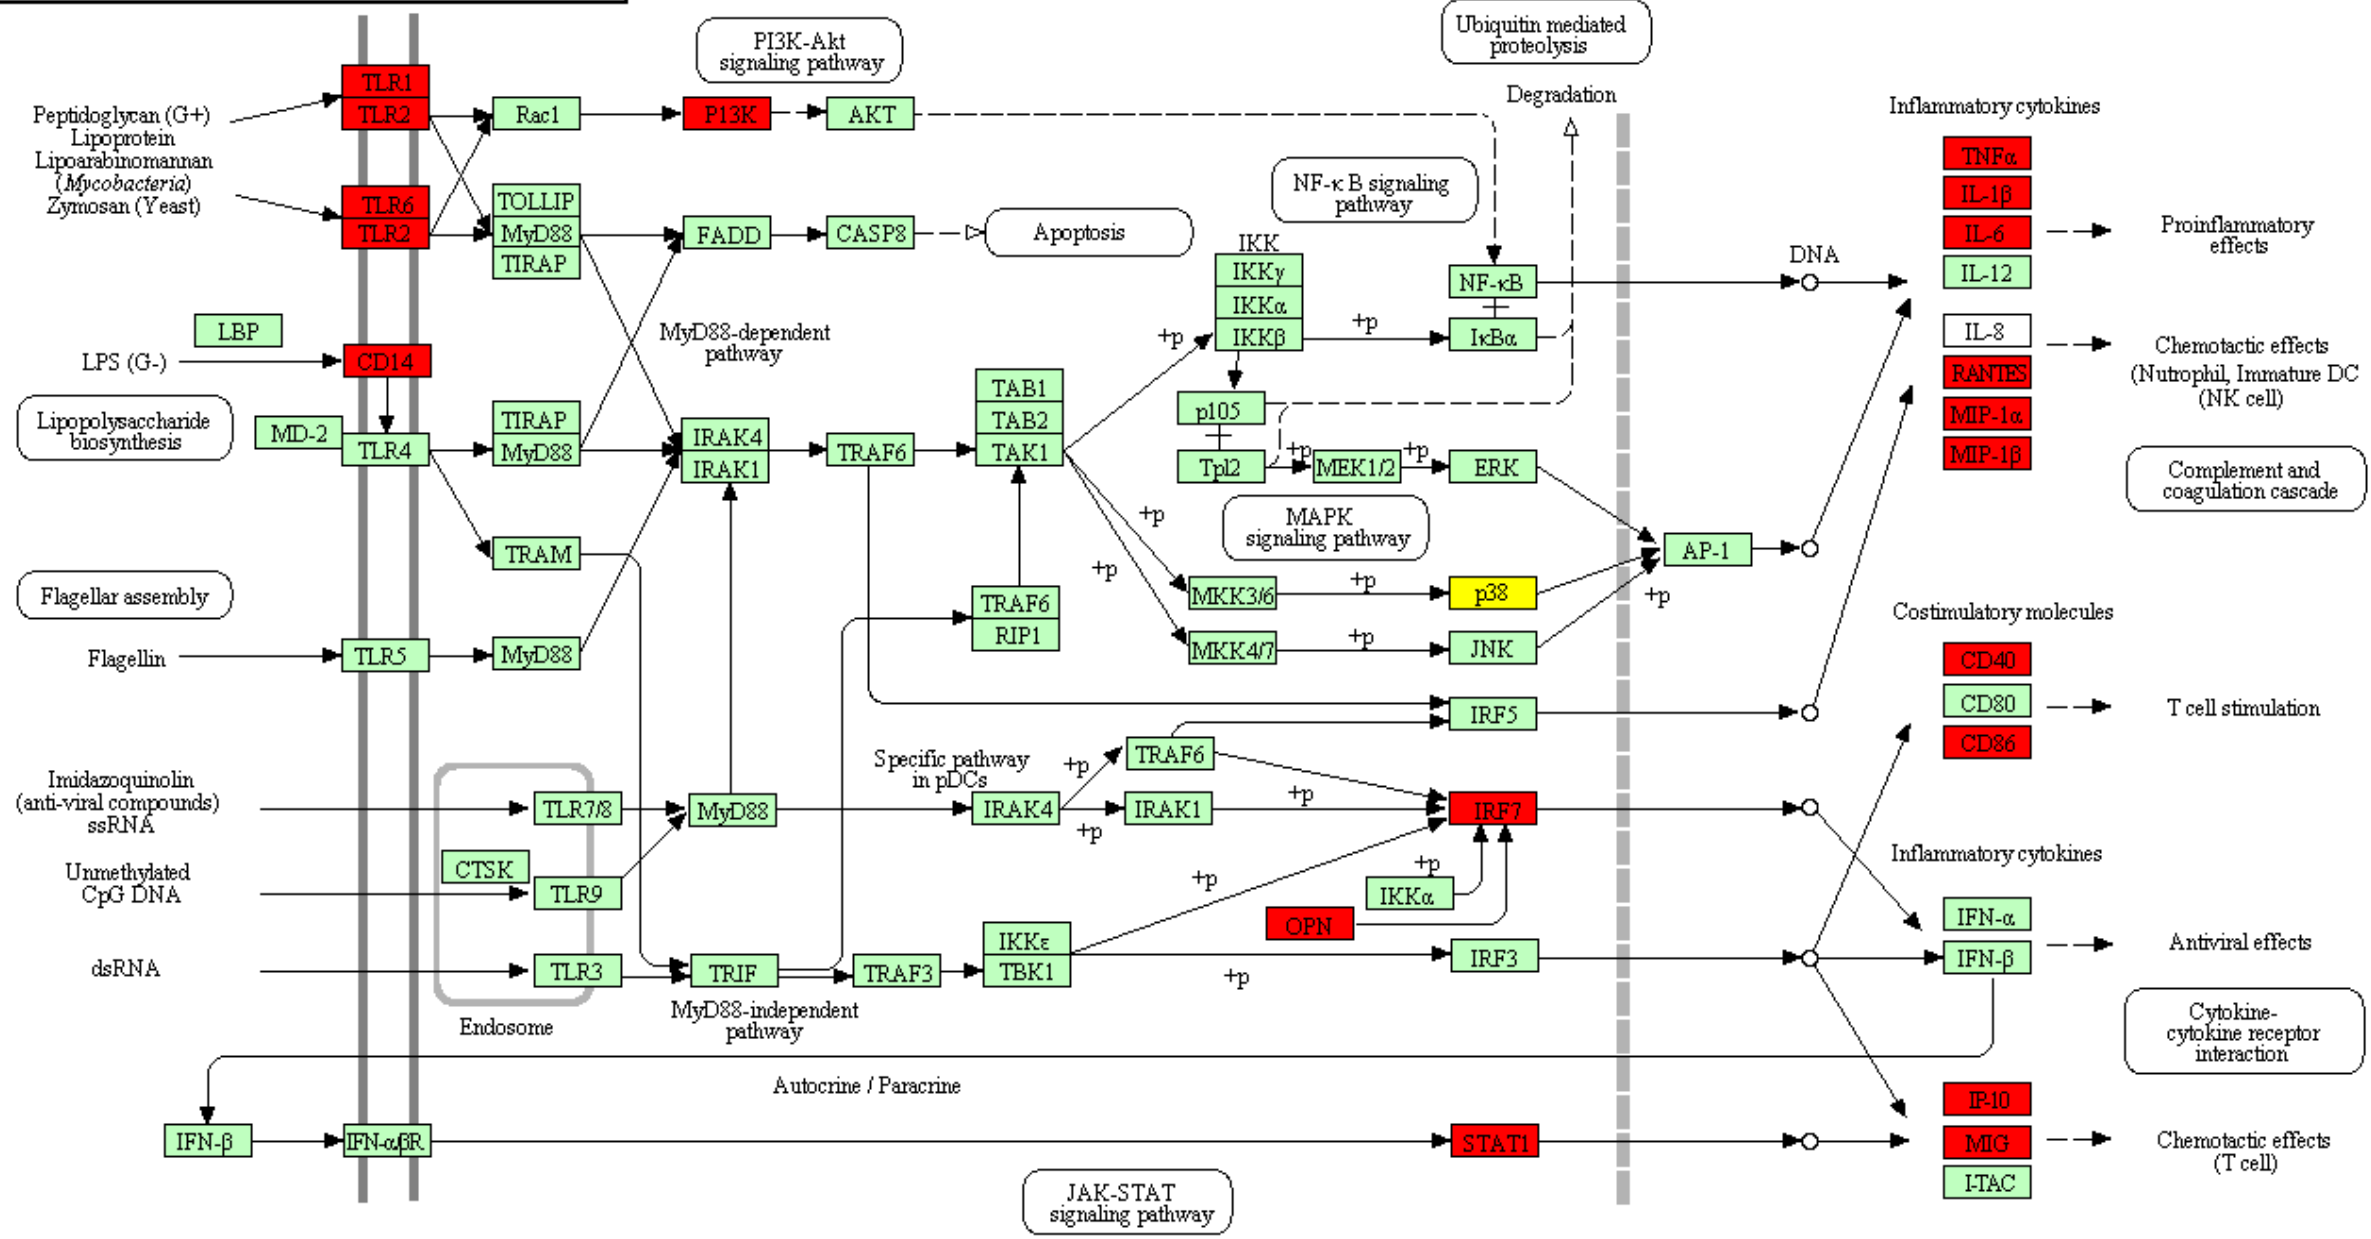

TOLL-LIKE RECEPTOR SIGNALING PATHWAY

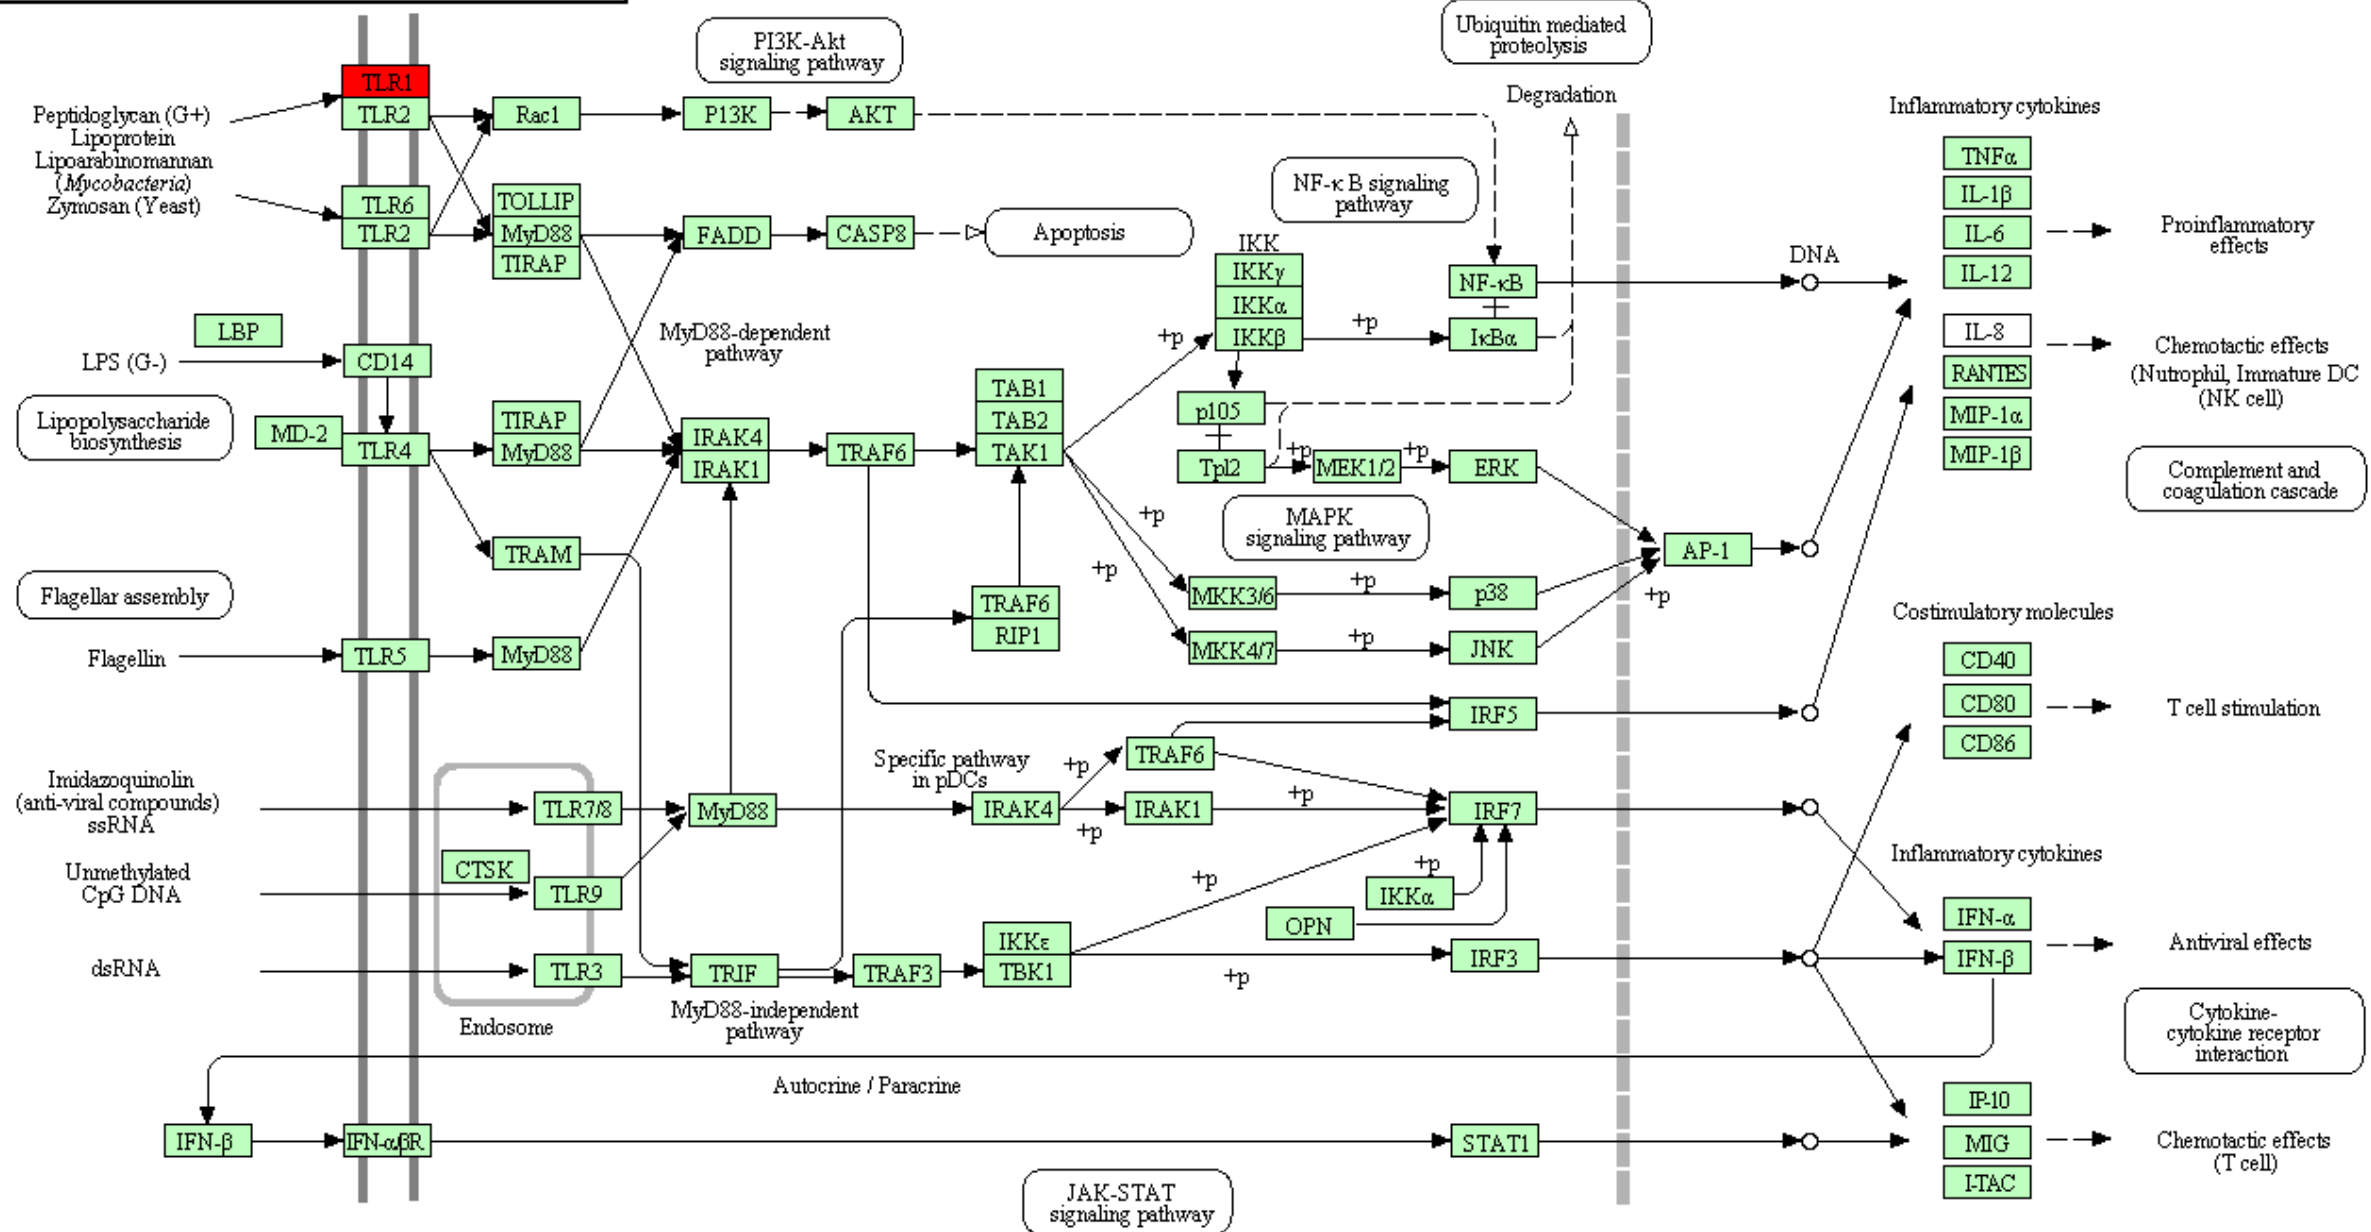

Supplement: 13073_2017_415_MOESM12_ESM.pdf [file 13073_2017_415_MOESM12_ESM.pdf]
