# Supplementary material for: Imiquimod has strain-dependent effects in mice and does not uniquely model human psoriasis
Source: PubMed Central journal article supplement (PMC5345243; doi:10.1186/s13073-017-0415-3), 2017-03-09

**Additional File 1. Histograms of weight change, epidermal thickness and spleen weight.**

(A, D) Distribution of weight change in CTL ( $n = 70$ ) and IMQ ( $n = 70$ ) mice. Negative values indicate weight loss with CTL or IMQ treatment. (B, E) Distribution of  $\log_{10}$ (epidermal thickness) in CTL ( $n = 69$ ) and IMQ ( $n = 70$ ) mice. (C, F) Distribution of spleen weight in CTL ( $n = 69$ ) and IMQ ( $n = 69$ ) mice. Dotted red lines in (A) – (F) represent density estimates obtained using the Gaussian kernel.

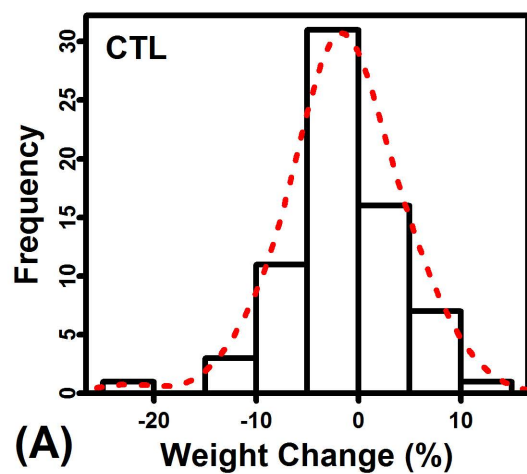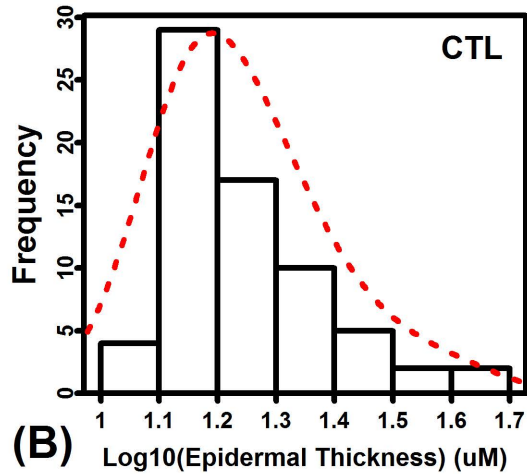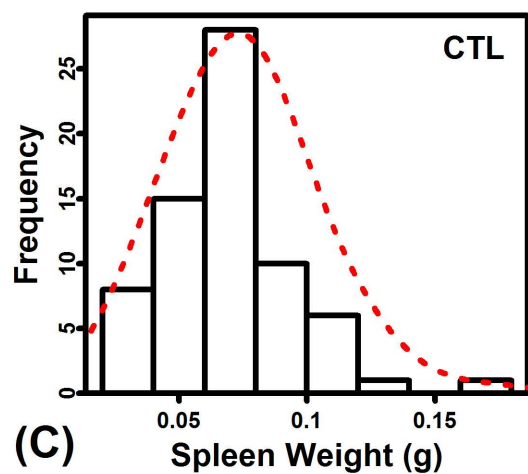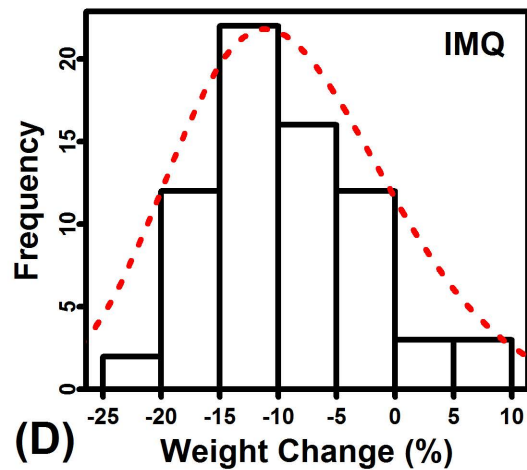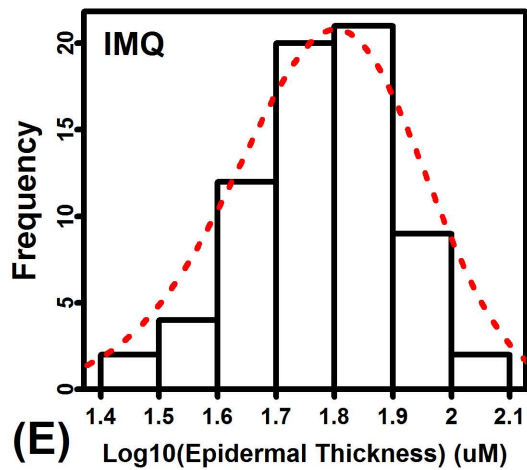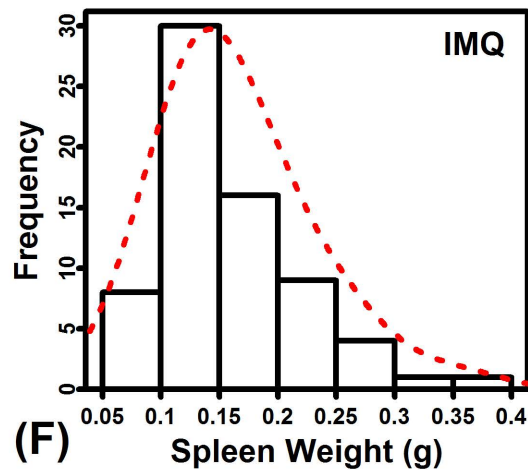

Supplement: 13073_2017_415_MOESM1_ESM.pdf [file 13073_2017_415_MOESM1_ESM.pdf]
