# Supplementary material for: Imiquimod has strain-dependent effects in mice and does not uniquely model human psoriasis
Source: PubMed Central journal article supplement (PMC5345243; doi:10.1186/s13073-017-0415-3), 2017-03-09

**Additional File 2. Mapping of reads to mouse genome ( $n = 56$  samples).** (A) Reads per sample. (B) Quality-filtered reads per sample. (C) Percentage of quality-filtered reads mapped to the mouse genome (GRCm38/mm10). (D) Average percentage of mapped quality-filtered reads per strain. (E) Percentage of reads mapped to exonic regions. (F) Average percentage of exonic reads per strain. In (D) and (F), groups without the same letter differ significantly ( $P < 0.05$ , Tukey honest significant difference).

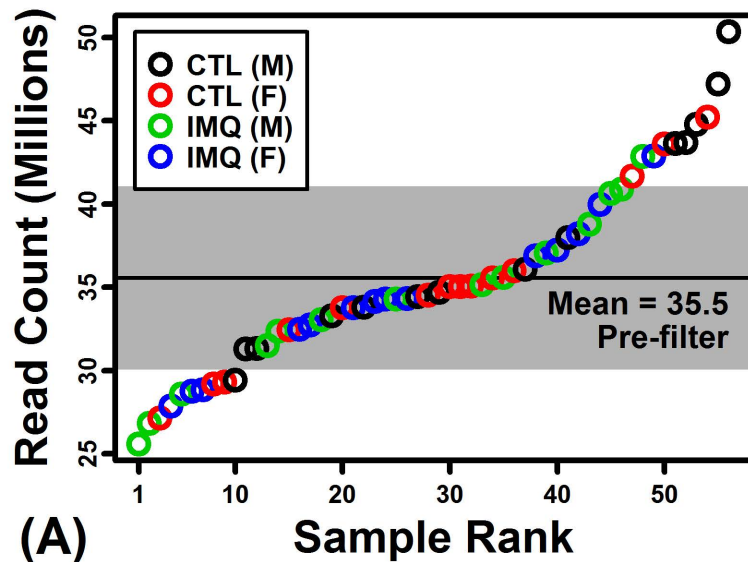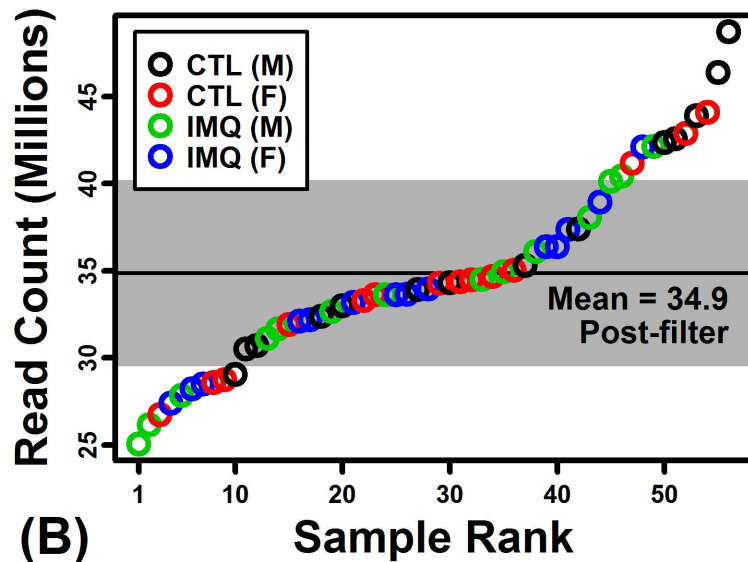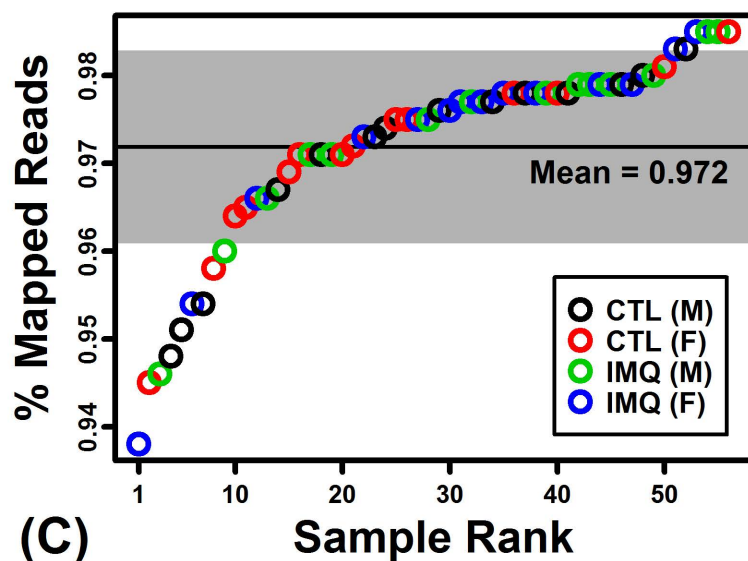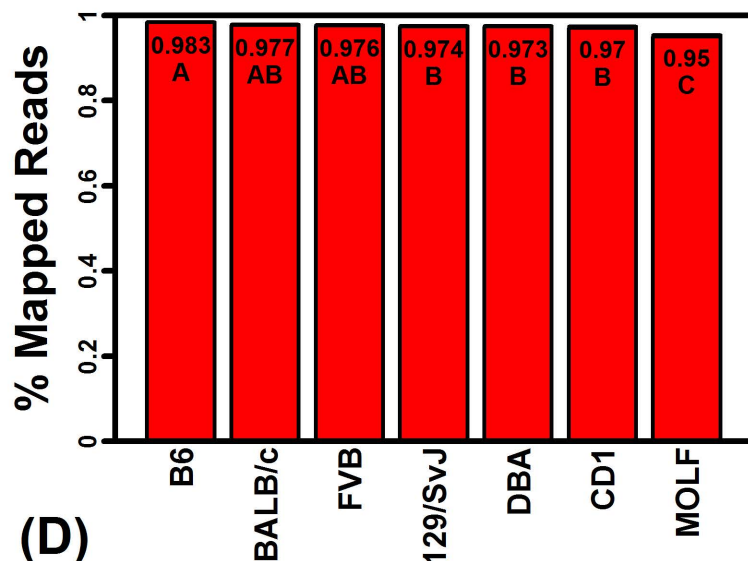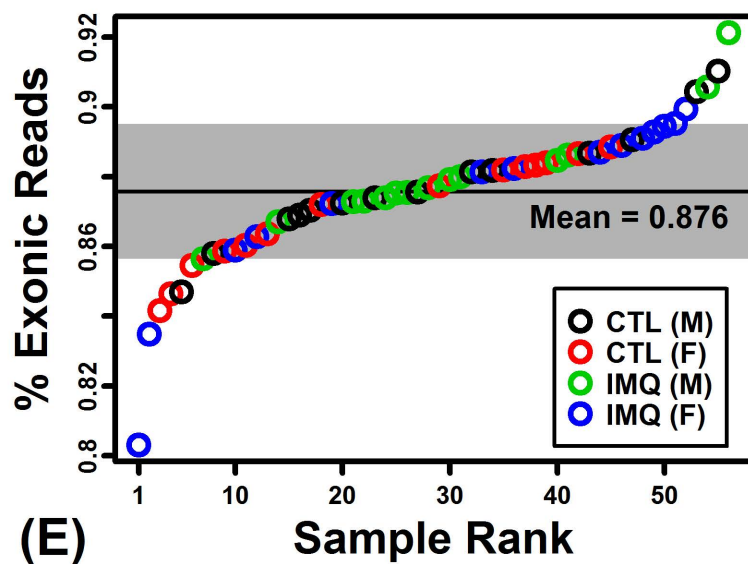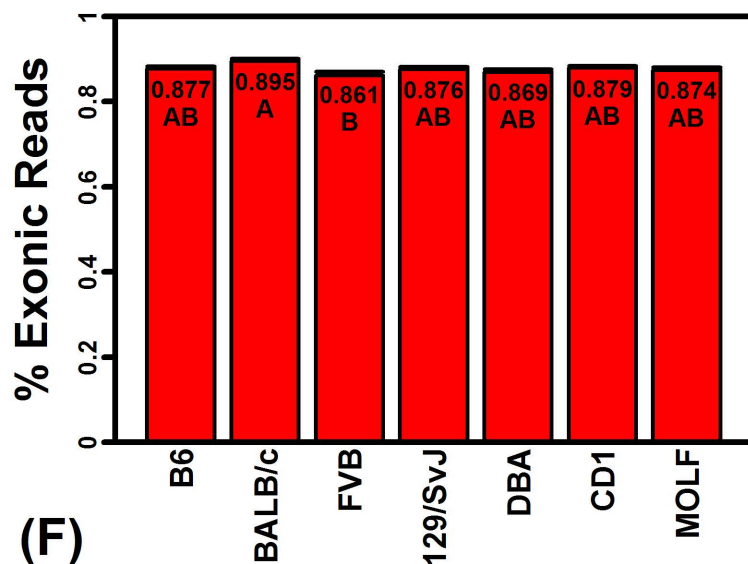

Supplement: 13073_2017_415_MOESM2_ESM.pdf [file 13073_2017_415_MOESM2_ESM.pdf]
