# Supplementary material for: Imiquimod has strain-dependent effects in mice and does not uniquely model human psoriasis
Source: PubMed Central journal article supplement (PMC5345243; doi:10.1186/s13073-017-0415-3), 2017-03-09

**Additional File 6. Number of differentially expressed genes and associations with CTL body weight, epidermal thickness and spleen weight.** Differentially expressed genes were identified for each strain-sex combination (FDR < 0.10; FC > 2.0 or FC < 0.5). The number of differentially expressed genes identified is shown (vertical axis) and compared to (A) CTL body weight, (B) CTL epidermal thickness and (C) CTL spleen weight ( $r$  = Spearman rank correlation; P = Spearman correlation p-value; dashed line: robust linear regression estimate).

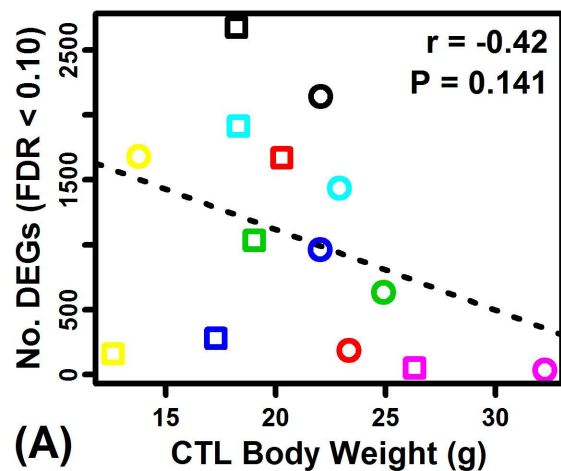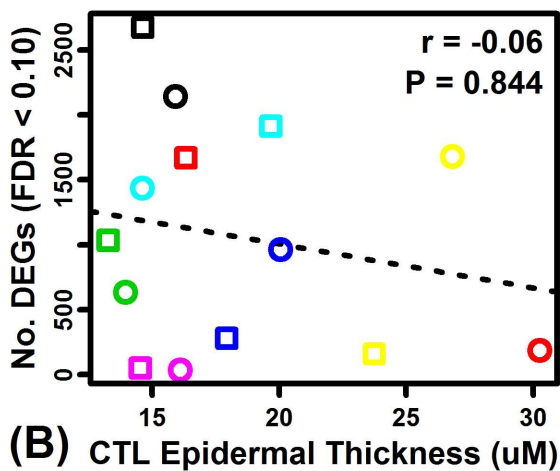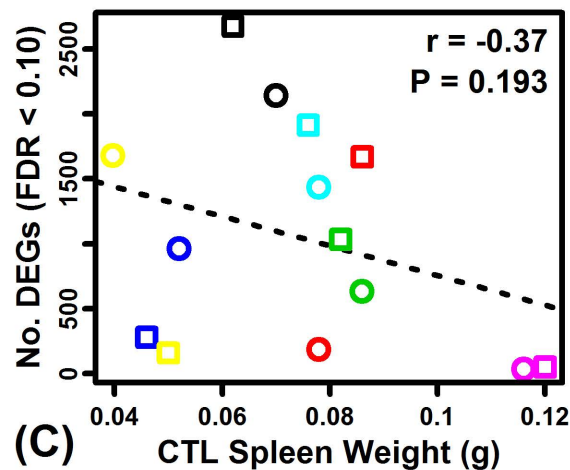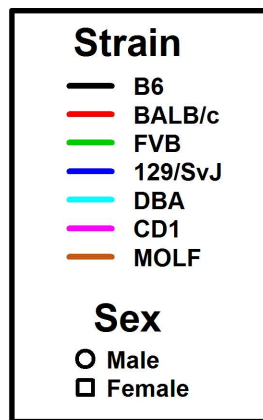

Supplement: 13073_2017_415_MOESM6_ESM.pdf [file 13073_2017_415_MOESM6_ESM.pdf]
