# Supplementary material for: Imiquimod has strain-dependent effects in mice and does not uniquely model human psoriasis
Source: PubMed Central journal article supplement (PMC5345243; doi:10.1186/s13073-017-0415-3), 2017-03-09

**Additional File 7. Microarray dataset comparison.** (A) Microarray datasets that have compared IMQ- and CTL-treated mouse skin. (B) RNA-seq vs. microarray correlation of FC estimates (rows: microarray datasets; columns: RNA-seq data from current study). (C) Overlap of genes elevated (top) or repressed (bottom) by IMQ in RNA-seq and microarray experiments (top:  $FC > 2.0$  with  $FDR < 0.10$ ; bottom:  $FC < 0.50$  with  $FDR < 0.10$ ). Microarray totals include genes altered in any of the 5 previous experiments. RNA-seq totals include genes altered in either sex of the B6 or BALB/c strains. (D) Gene density scatterplots comparing FC estimates (IMQ/CTL) from previous array studies (GSE27628 or GSE47607; horizontal axes) to RNA-seq estimates from B6, BALB/c or MOLF mice (vertical axes). (E) IMQ-increased DEGs identified by RNA-seq but not previously by microarray ( $FC > 2.0$  with  $FDR < 0.10$ ). (F) IMQ-decreased DEGs identified by RNA-seq but not previously by microarray ( $FC < 0.50$  with  $FDR < 0.10$ ).

**(A)**

Mouse expression datasets: IMQ- vs. CTL-treated skin (Aldara, 5% IMQ)

| GSE#  | Strain | Sex | Region | Days | Dose    |
|-------|--------|-----|--------|------|---------|
| 27628 | B6     | ?   | back   | 6    | 62.5 mg |
| 47607 | B6     | ?   | back   | 2    | 30 mg   |
| 60804 | B6     | F   | back   | 7    | 62.5 mg |
| 63684 | BALB/c | M   | back   | 7    | 62.5 mg |
| 78057 | B6     | ?   | ear    | 3    | 31.2 mg |

**(B)**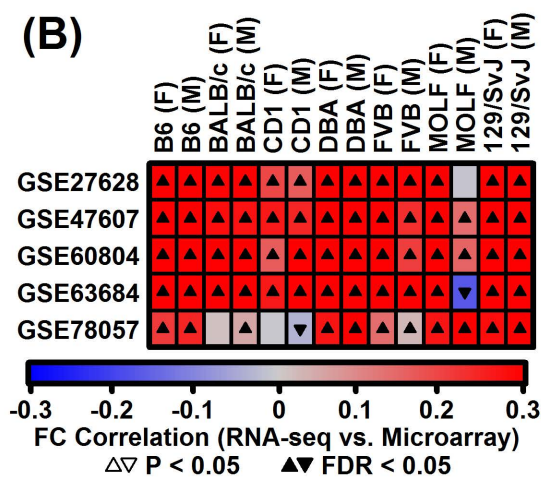**(C)**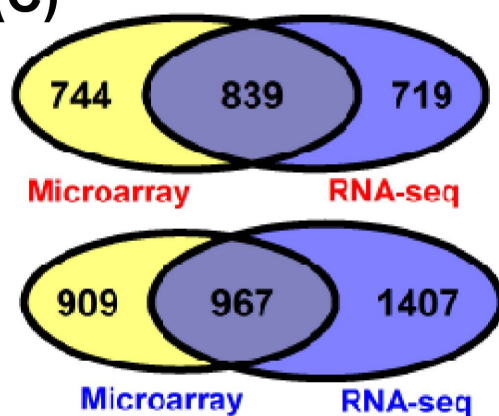**(D)**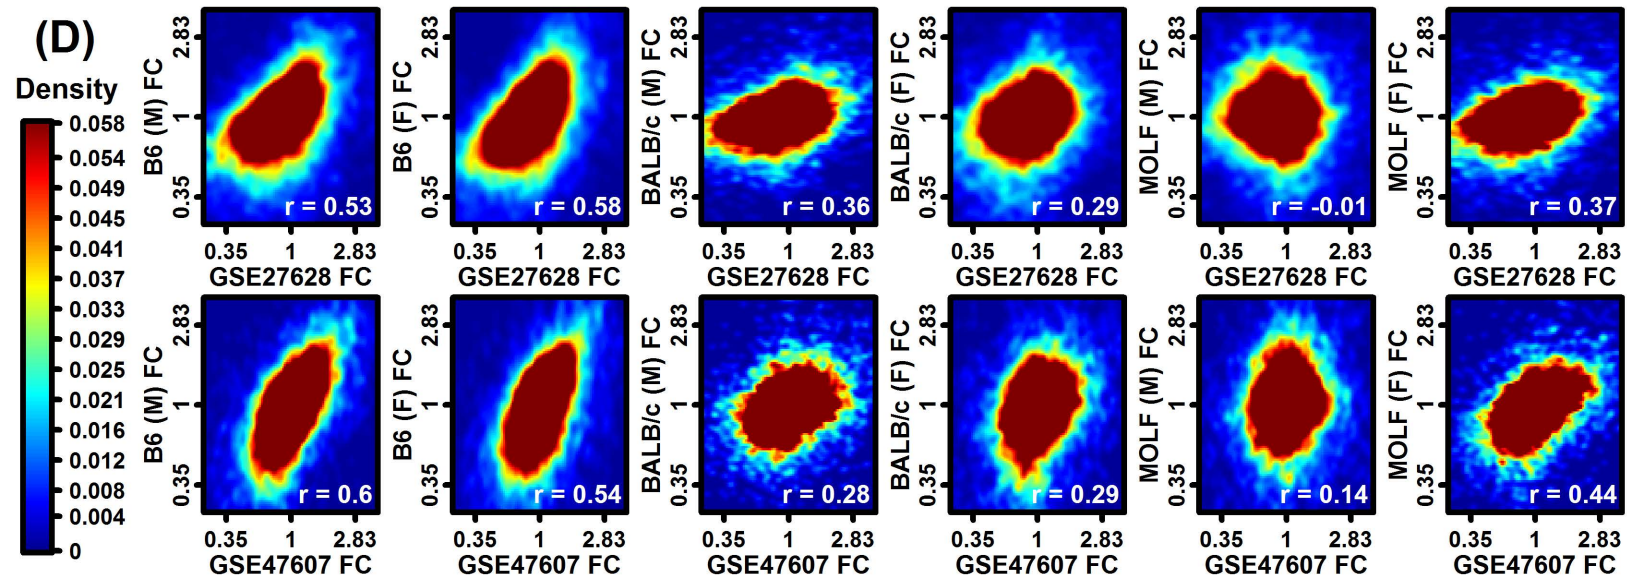**(E)**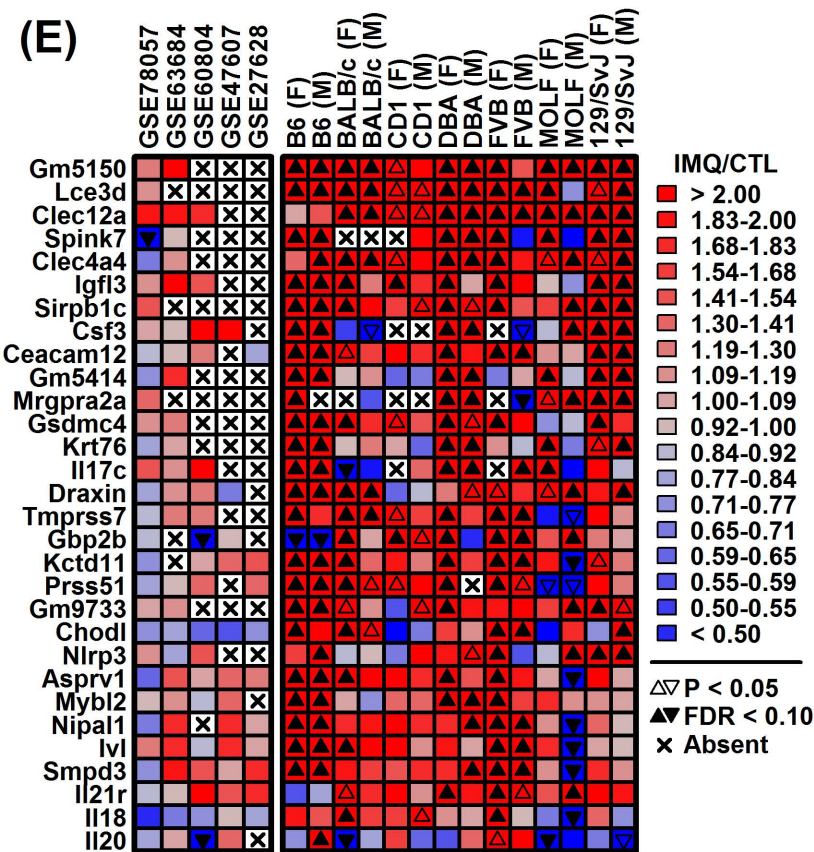**(F)**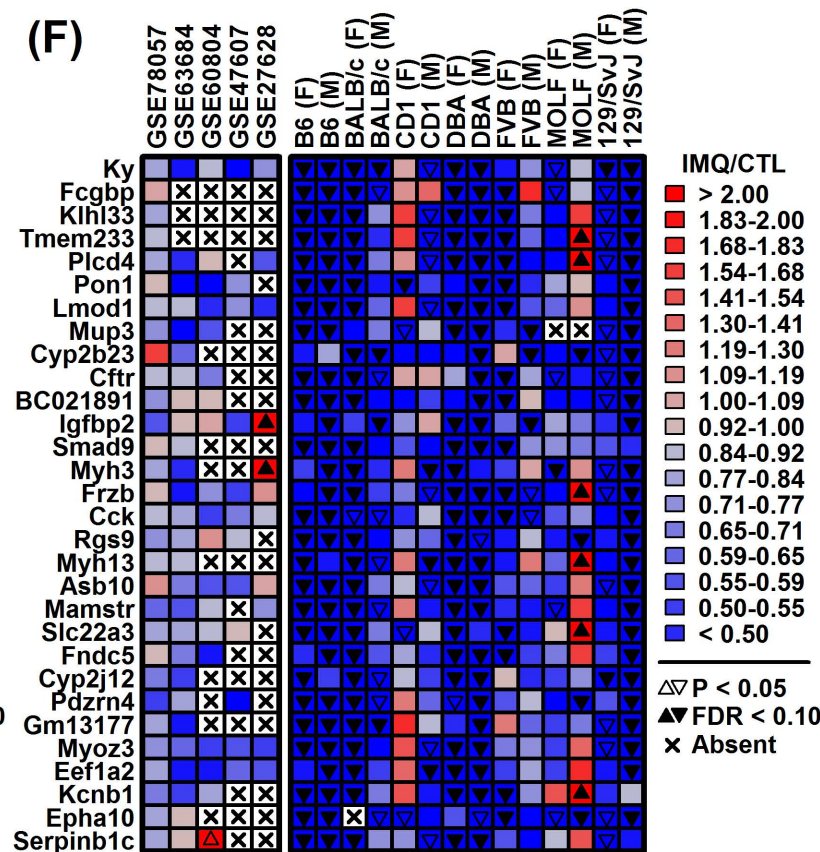

Supplement: 13073_2017_415_MOESM7_ESM.pdf [file 13073_2017_415_MOESM7_ESM.pdf]
