# Supplementary material for: Imiquimod has strain-dependent effects in mice and does not uniquely model human psoriasis
Source: PubMed Central journal article supplement (PMC5345243; doi:10.1186/s13073-017-0415-3), 2017-03-09

**Additional File 8. Comparison of IMQ responses to human psoriasis lesions. (A)**

IMQ/psoriasis FC comparison. Gene density plots compare mouse FC estimates (IMQ/CTL) to psoriasis FC estimates (involved/uninvolved skin) for homologous genes. (B) Psoriasis-increased DEGs. Enrichment of psoriasis-increased DEGs was assessed relative to gene lists ranked according to IMQ response (\*FDR < 0.05). (C) Psoriasis-decreased DEGs. Enrichment of psoriasis-decreased DEGs was assessed relative to gene lists ranked according to IMQ response (\*FDR < 0.05). (E) Genes most strongly elevated in human psoriasis lesions. (F) Genes most strongly decreased in human psoriasis lesions.

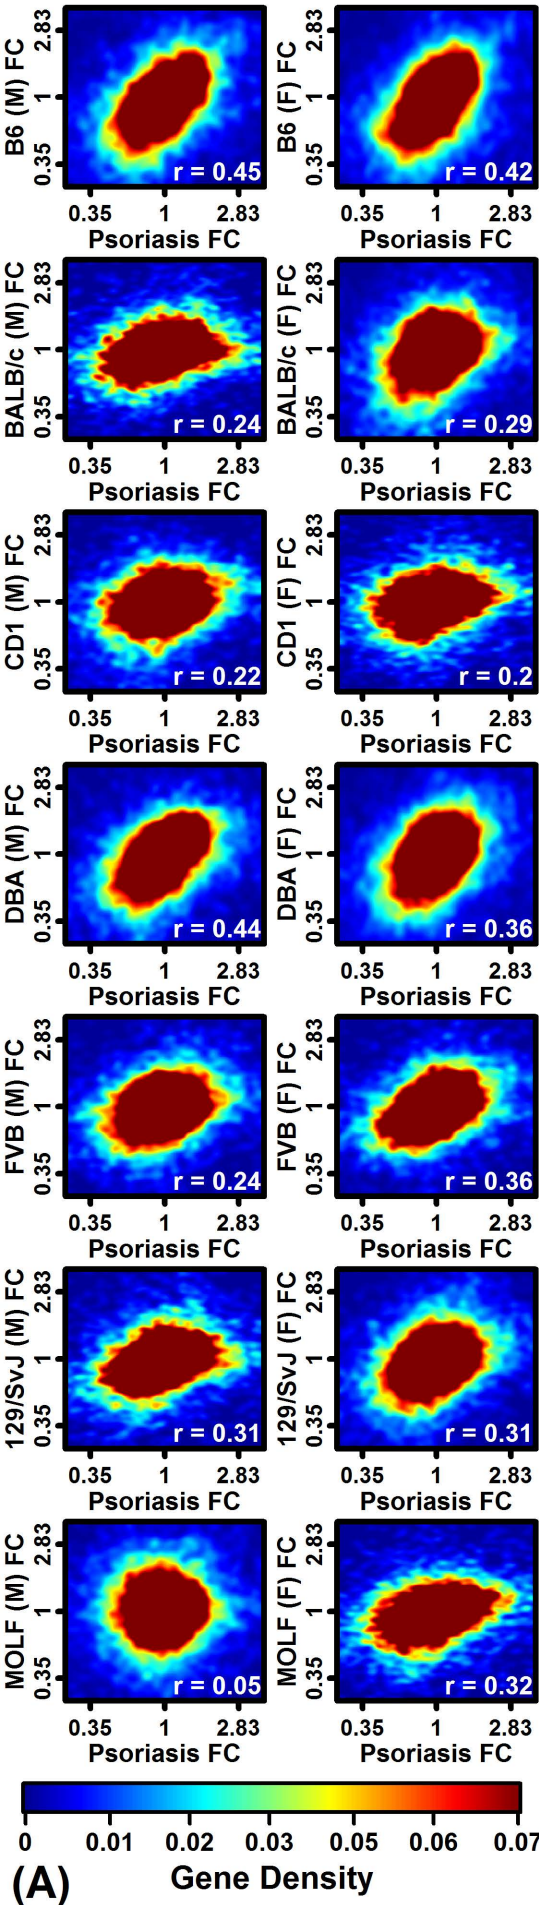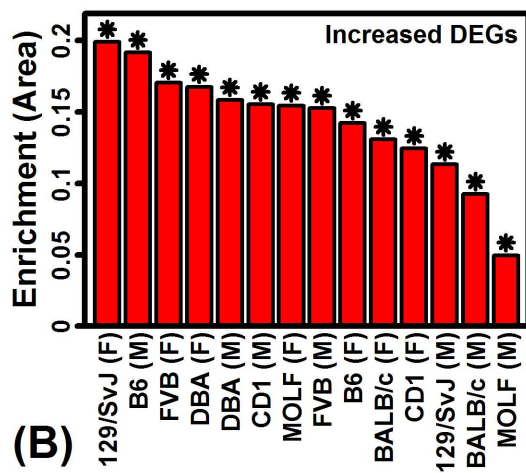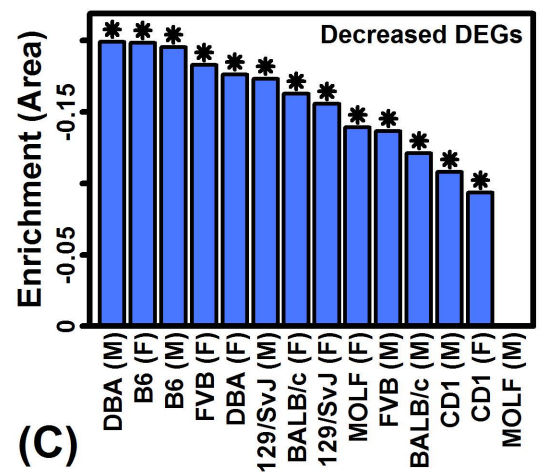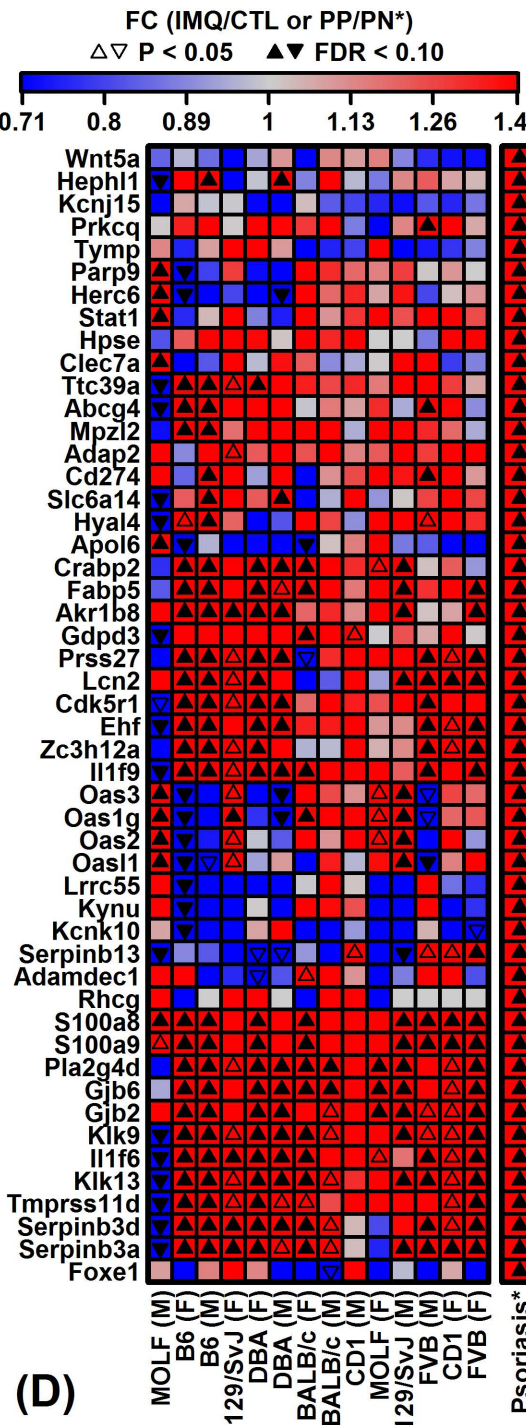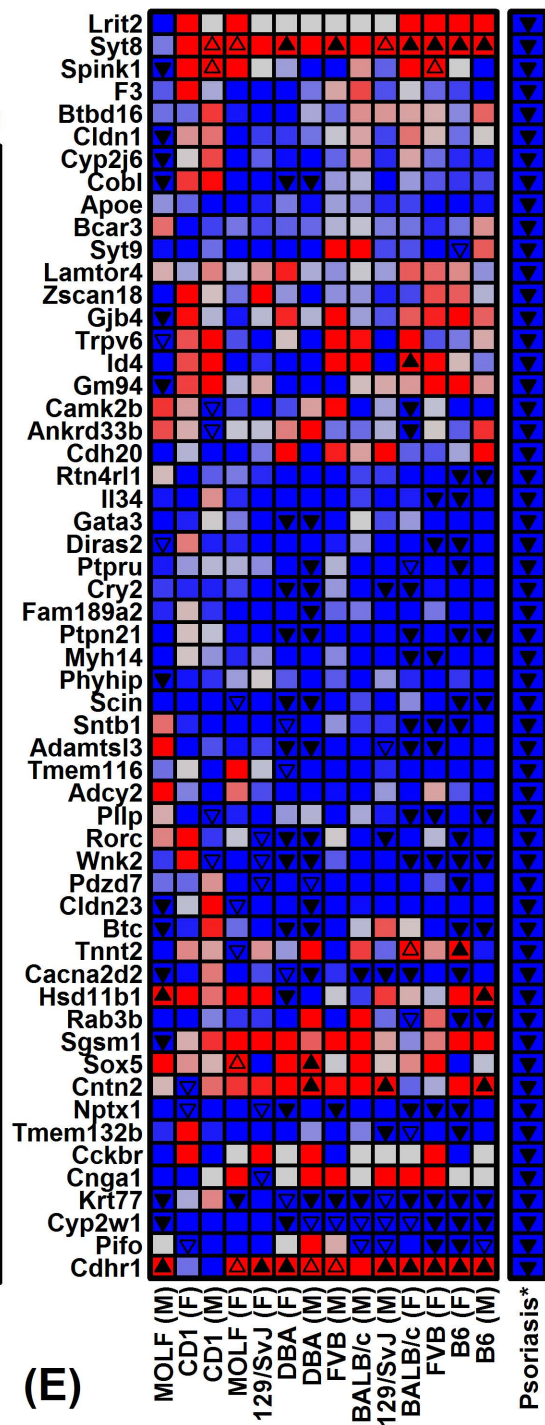

Supplement: 13073_2017_415_MOESM8_ESM.pdf [file 13073_2017_415_MOESM8_ESM.pdf]
