# Supplementary material for: Imiquimod has strain-dependent effects in mice and does not uniquely model human psoriasis
Source: PubMed Central journal article supplement (PMC5345243; doi:10.1186/s13073-017-0415-3), 2017-03-09

**Additional File 9. Gene ontology (GO) biological process (BP) terms enriched among psoriasis-decreased DEGs and correspondence with IMQ responses.** (A) Psoriasis-enriched GO BP terms. Heatmap colors depict average IMQ responses of 10 representative mouse homologues for each GO BP term. Chosen genes are homologous to the 10 human genes associated with the listed term for which expression was most strongly decreased in psoriasis lesions (i.e., lowest p-value). (B) Psoriasis-decreased DEGs associated with homeostatic GO BP terms (blue font in part (A)). (C) Psoriasis-decreased DEGs associated with transport GO BP terms (red font in part (A)). (D, E) RT-PCR analysis of (D) *Atp13a5* and (E) *P2rx1* expression ( $n \geq 4$  per strain/sex/treatment group;  $n = 38$  mice total). Groups without the same letter differ significantly ( $P < 0.05$ , Tukey honest significant difference; Error bars: standard error of the mean; p-values: strain-by-treatment interaction effect). *Rn18s* was used as an endogenous control to estimate relative gene expression.

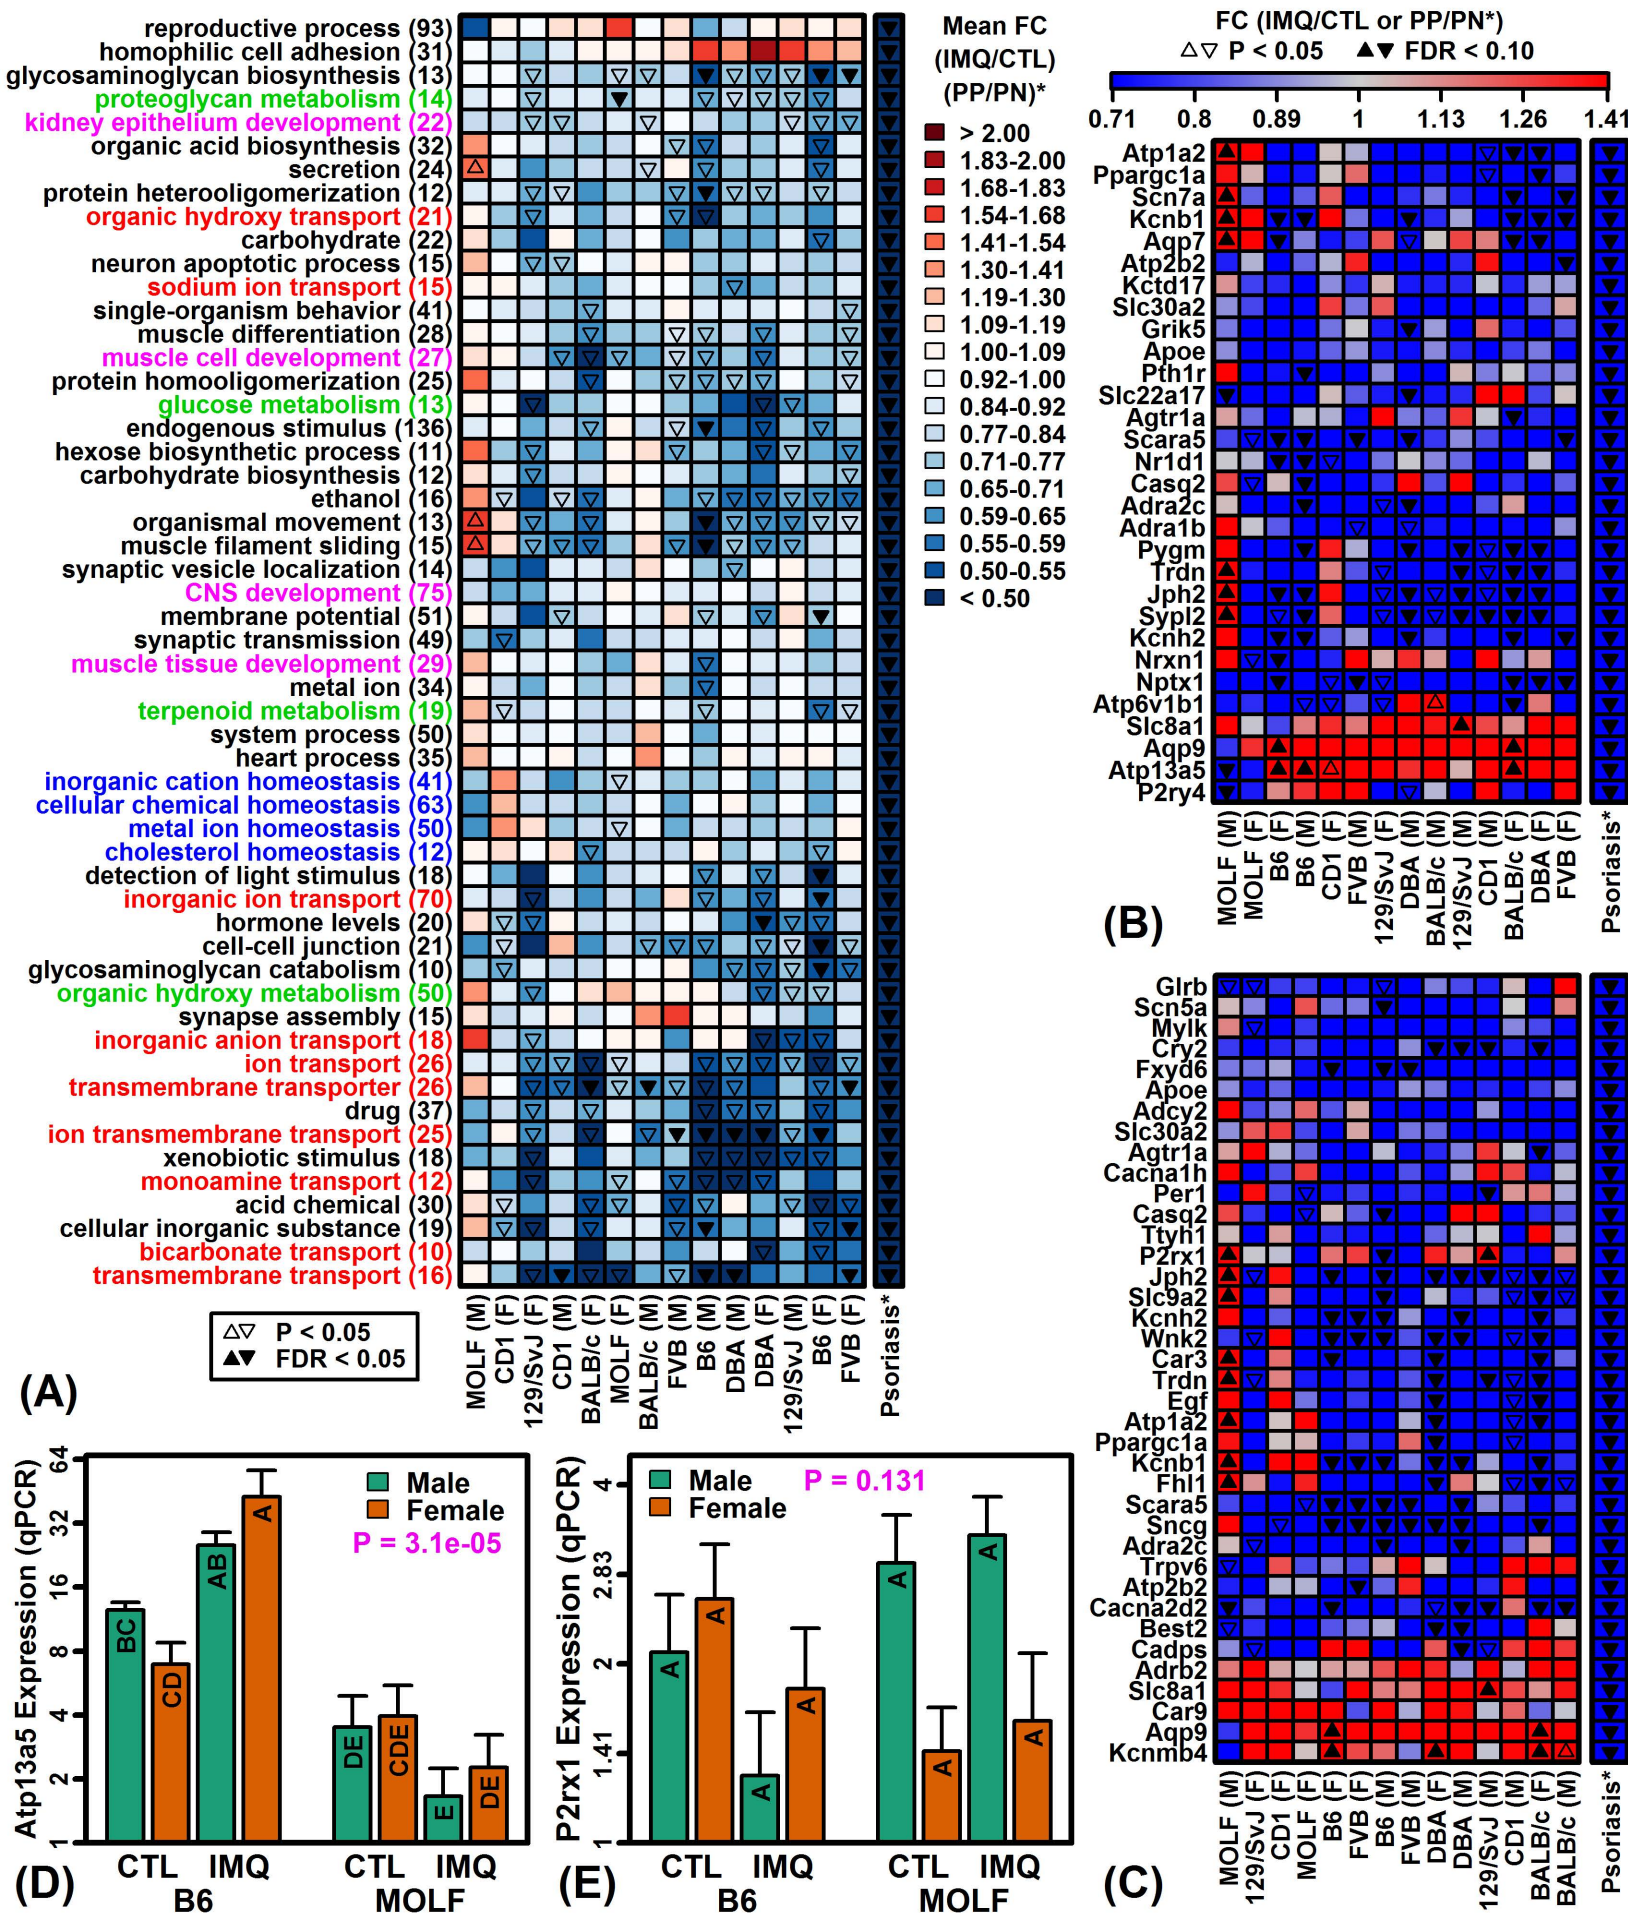

Supplement: 13073_2017_415_MOESM9_ESM.pdf [file 13073_2017_415_MOESM9_ESM.pdf]
