# Supplementary material for: Imiquimod has strain-dependent effects in mice and does not uniquely model human psoriasis
Source: PubMed Central journal article supplement (PMC5345243; doi:10.1186/s13073-017-0415-3), 2017-03-09

**Additional File 10. IL-17 family gene expression (*Il17a*, *Il17b*, *Il17c*, *Il17d*, *Il17e*, *Il17f*).** RT-PCR was used to evaluate relative gene expression of IL-17 family genes in B6 and BALB/c mice ( $n = 5$  per strain/sex/treatment group;  $n = 40$  mice total). Groups without the same letter differ significantly ( $P < 0.05$ , Tukey honest significant difference; Error bars: standard error of the mean; p-values: strain-by-treatment interaction effect). *Rn18s* was used as an endogenous control to estimate relative gene expression.

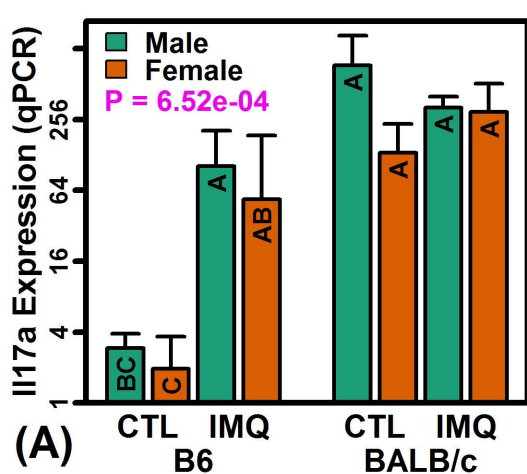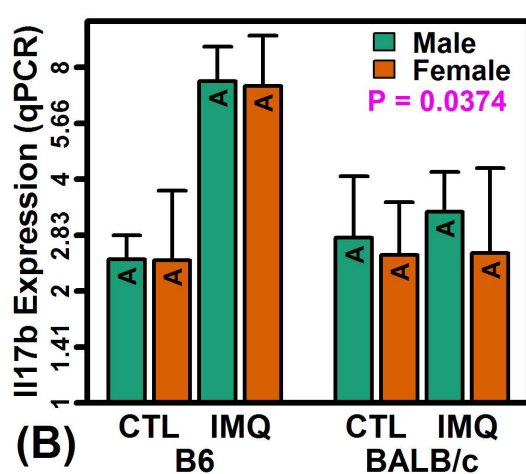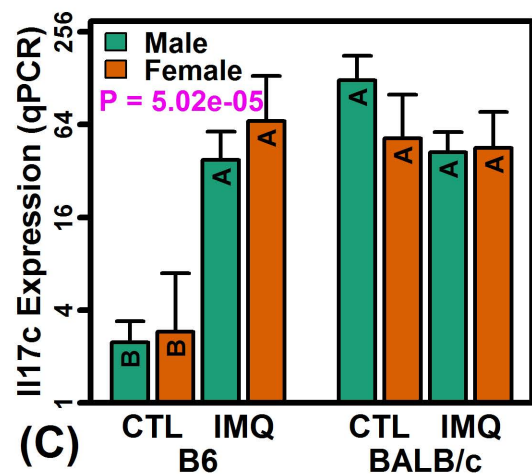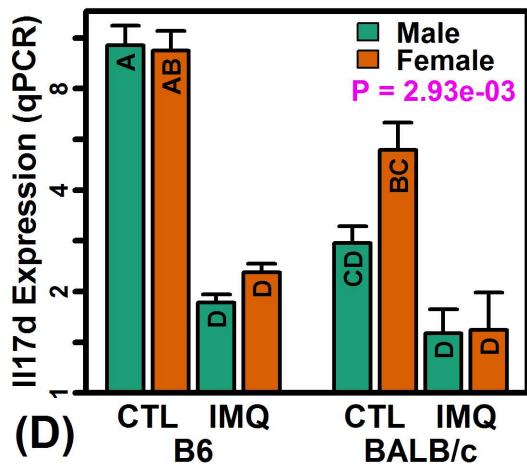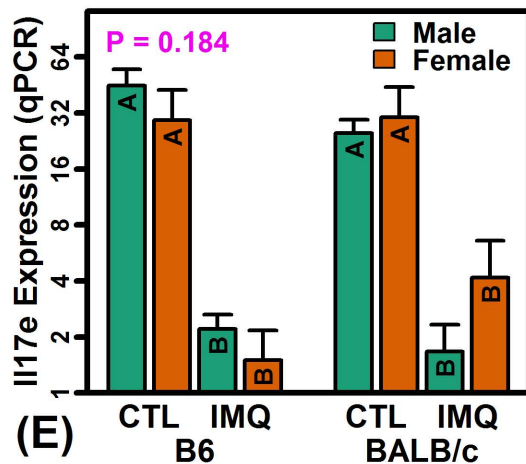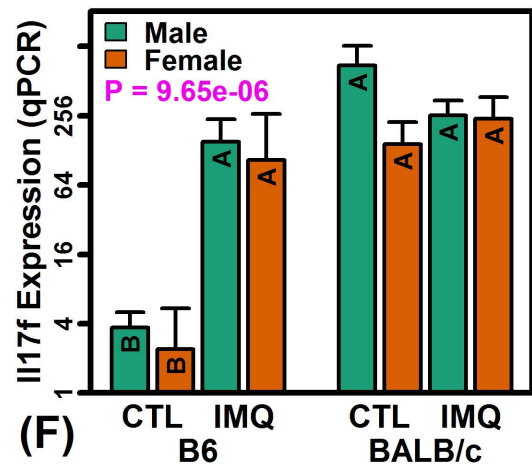

Supplement: 13073_2017_415_MOESM10_ESM.pdf [file 13073_2017_415_MOESM10_ESM.pdf]
