# Supplementary material for: Imiquimod has strain-dependent effects in mice and does not uniquely model human psoriasis
Source: PubMed Central journal article supplement (PMC5345243; doi:10.1186/s13073-017-0415-3), 2017-03-09

**Additional File 11. Genes uniquely altered by IMQ in MOLF males.** (A) Genes uniquely increased by IMQ in MOLF males. (B) Genes uniquely decreased by IMQ in MOLF males. (C, D) RT-PCR analysis of (C) *Il1f5* and (D) *Krt1* expression ( $n \geq 4$  per strain/sex/treatment group;  $n = 38$  mice total). Groups without the same letter differ significantly ( $P < 0.05$ , Tukey honest significant difference; Error bars: standard error of the mean; p-values: strain-by-treatment interaction effect). *Rn18s* was used as an endogenous control to estimate relative gene expression. (E) GO BP terms enriched among genes uniquely increased by IMQ in MOLF males (right margin: exemplar IMQ-increased genes). (F) GO BP terms enriched among genes uniquely decreased by IMQ in MOLF males (right margin: exemplar IMQ-decreased genes).

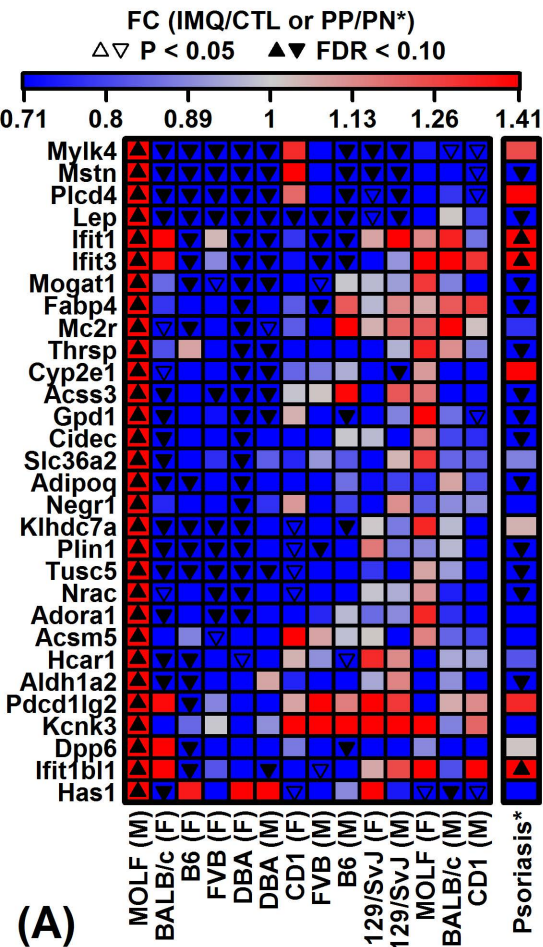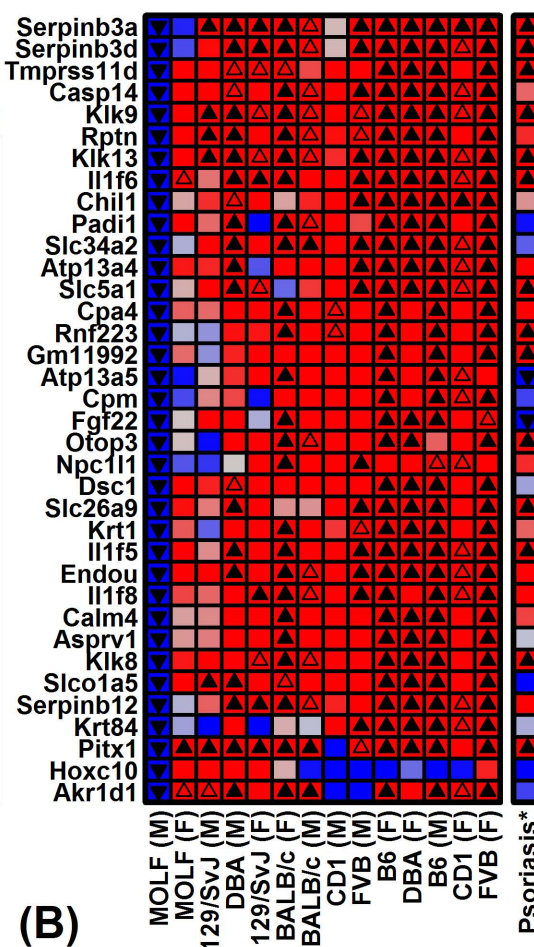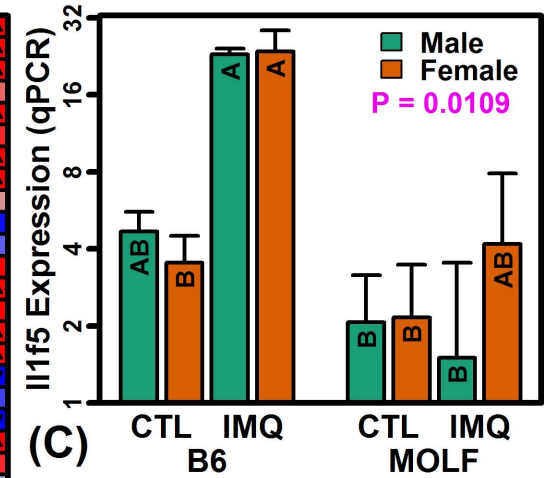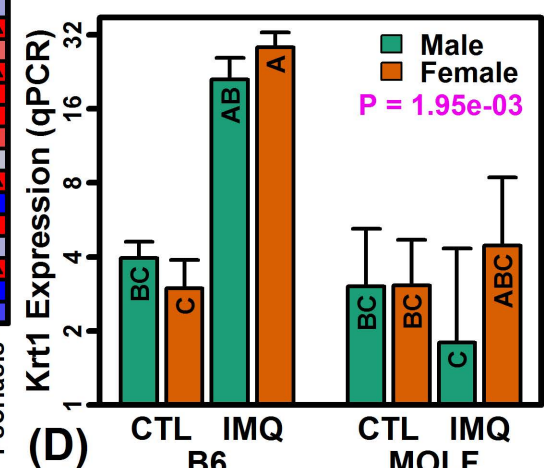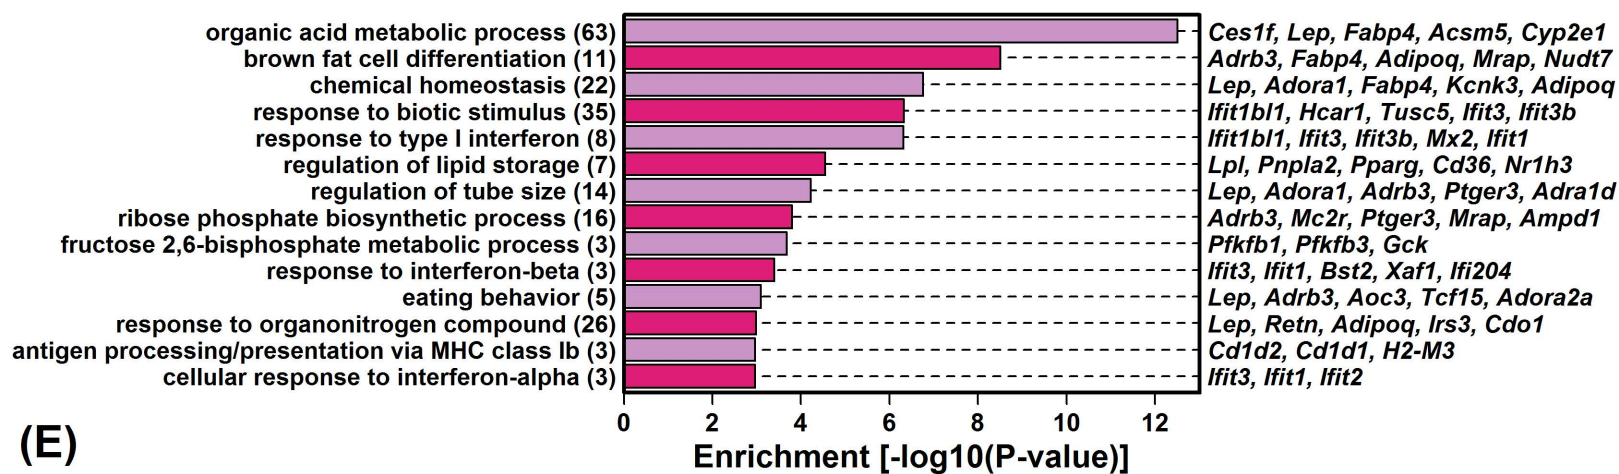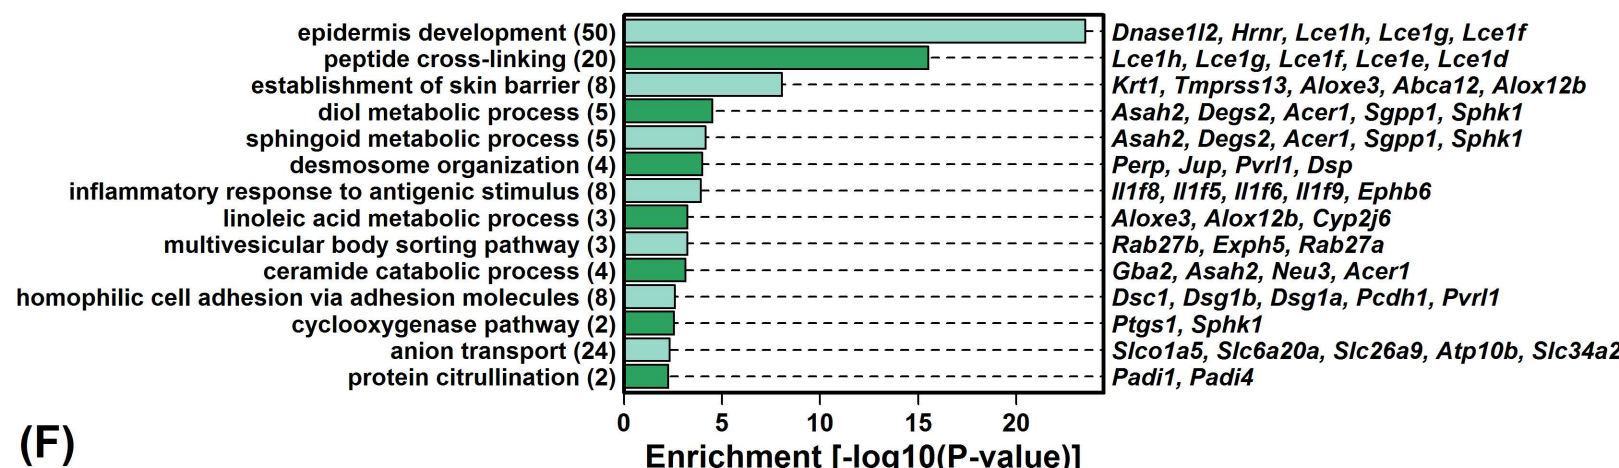

Supplement: 13073_2017_415_MOESM11_ESM.pdf [file 13073_2017_415_MOESM11_ESM.pdf]
