# Supplementary material for: Imiquimod has strain-dependent effects in mice and does not uniquely model human psoriasis
Source: PubMed Central journal article supplement (PMC5345243; doi:10.1186/s13073-017-0415-3), 2017-03-09

**Additional File 13. Psoriasis-specific genes with altered expression in psoriasis lesions but not other human skin diseases.** (A) Psoriasis-increased DEGs with the most psoriasis-specific expression patterns. Psoriasis-specificity is measured by the psoriasis specificity index (horizontal axis), with larger values indicating more psoriasis-specific expression. Heatmap colors depict IMQ expression responses for homologous mouse genes. (B) Match scores. Scores represent average FC (IMQ/CTL) of the 30 genes shown in (A) (right margin: average score for each strain-sex group; red font:  $P < 0.05$ , Wilcoxon rank sum test). (C) *Atp1b1* expression (B6 and BALB/C). *Atp1b1* is the most psoriasis-specific gene with elevated expression in psoriasis lesions. (D) Psoriasis-decreased DEGs with the most psoriasis-specific expression patterns. Larger psoriasis specificity index values indicate more psoriasis-specific expression. Heatmap colors depict IMQ expression responses for homologous mouse genes. (E) Match scores. Scores represent average FC (CTL/IMQ) of the 30 genes shown in (D). (F) *Krt13* expression (B6 and BALB/C). *Krt13* is the most psoriasis-specific gene with decreased expression in psoriasis lesions. In (C) and (F), groups without the same letter differ significantly ( $P < 0.05$ , Tukey honest significant difference; Error bars: standard error of the mean).

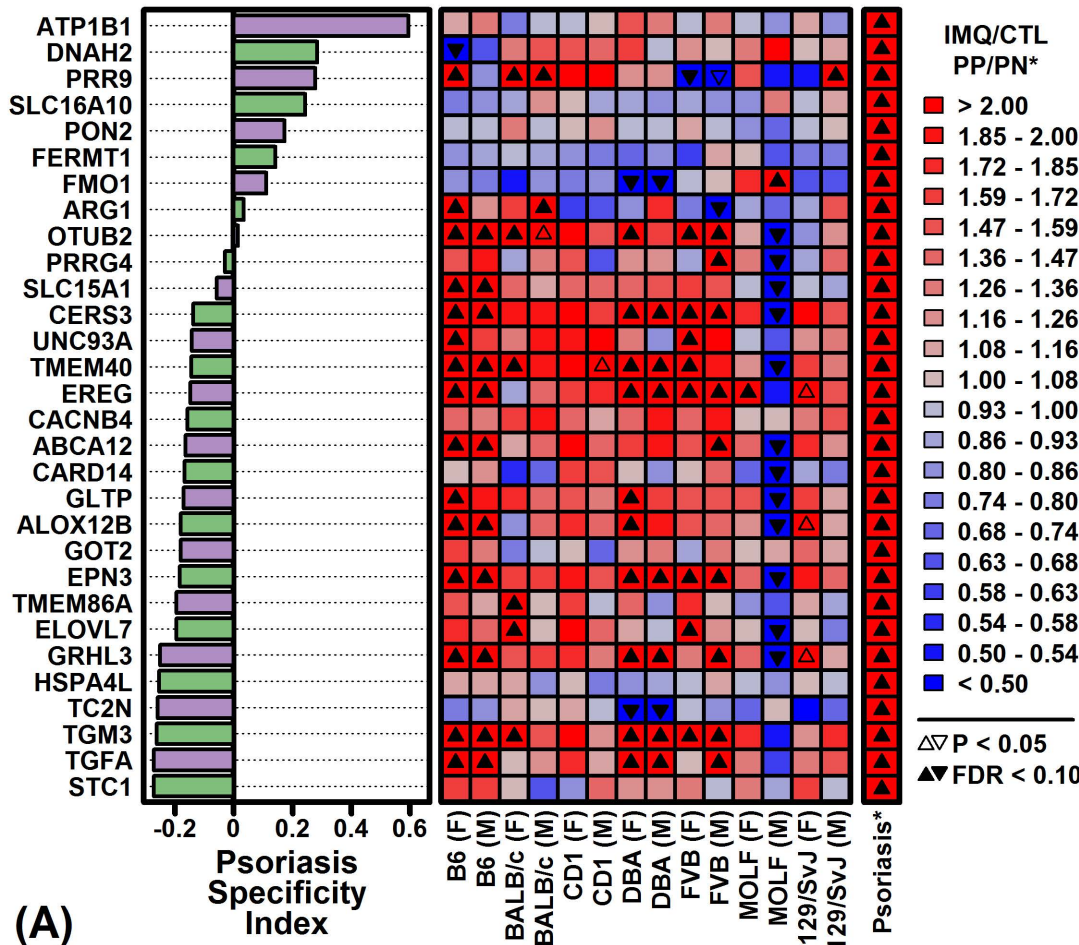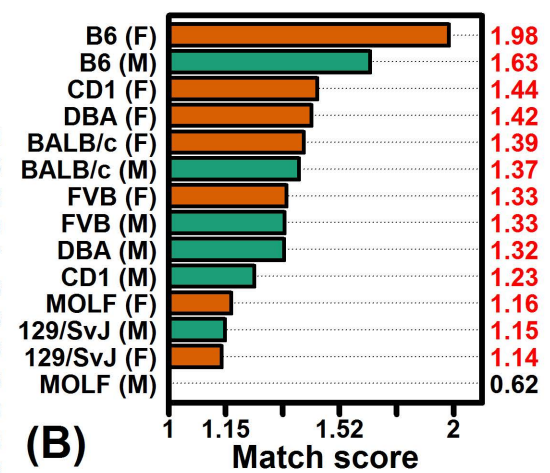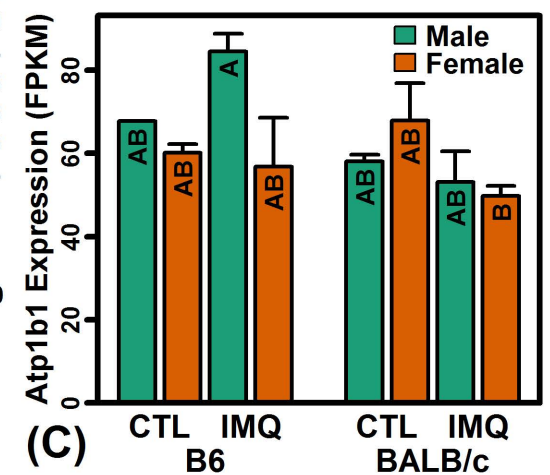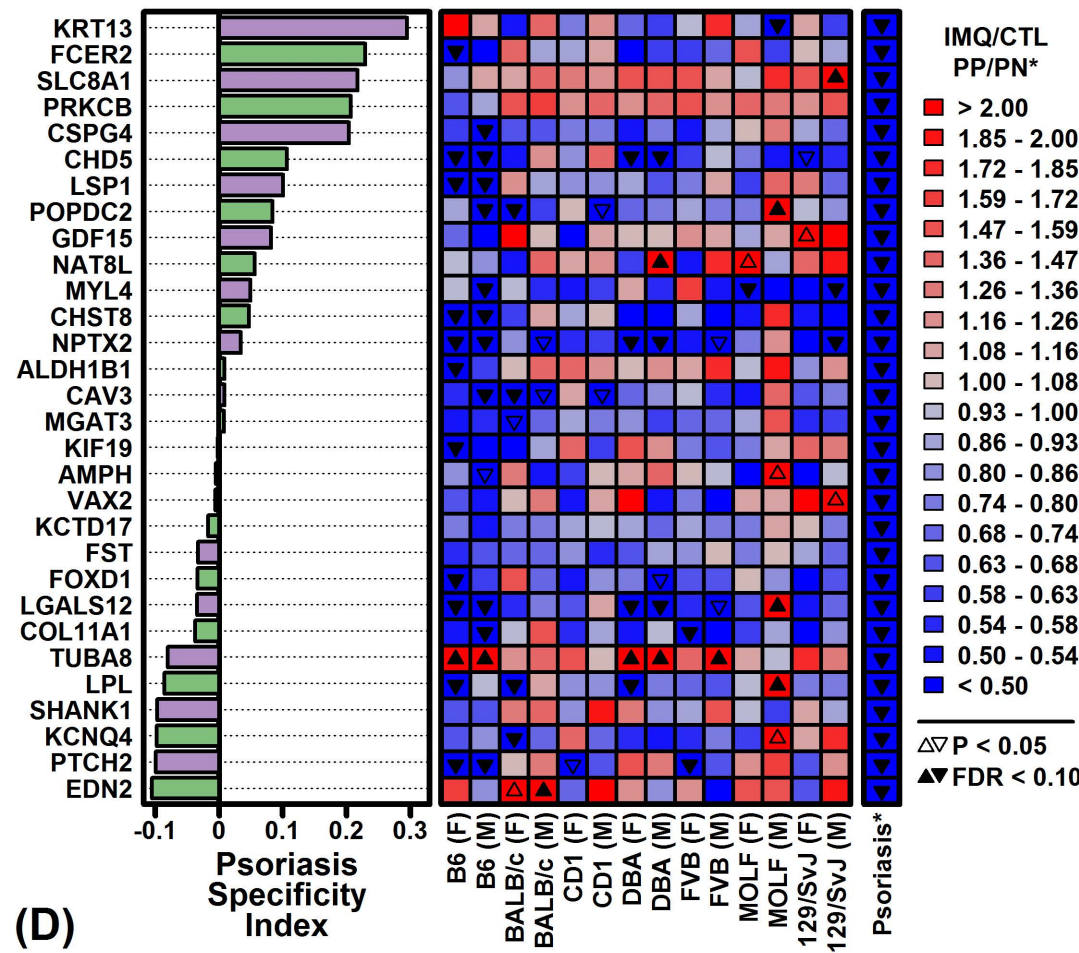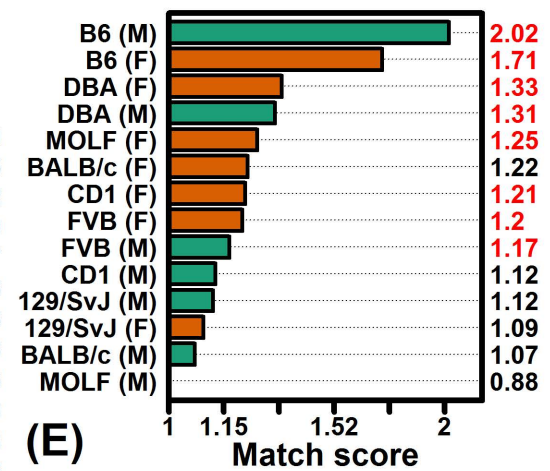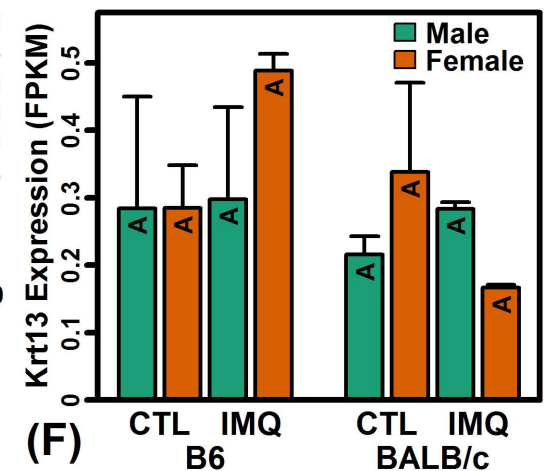

Supplement: 13073_2017_415_MOESM13_ESM.pdf [file 13073_2017_415_MOESM13_ESM.pdf]
